# Supplementary material for: Long-Term Culturing of FreeStyle 293-F Cells Affects Immunoglobulin G Glycome Composition
Source: Biomolecules. 2023 Aug 14;13(8):1245. doi: 10.3390/biom13081245 (PMC10452533; doi:10.3390/biom13081245)
Supplement: Supplementary file 1 [file biomolecules-13-01245-s001.zip › biomolecules-2532766-Supplementary tables_v02.xlsx]

## Sheet: Supplementary table names
	Table S1. Derived IgG glycan traits
	Table S2. Statistical analysis of the changes in IgG galactosylation between passages in the time-course experiments. Unpaired two-tailed Student’s t-test was performed using R. * P adj< 0.05, ** P adj < 0.01, *** P adj < 0.001, **** P adj < 0.0001.
	Table S3. Statistical analysis of the changes in IgG agalactosylation between passages in the time-course experiments. Unpaired two-tailed Student’s t-test was performed using R. * P adj< 0.05, ** P adj < 0.01, *** P adj < 0.001, **** P adj < 0.0001.
	Table S4. Statistical analysis of the changes in IgG core fucosylation between passages in the time-course experiments. Unpaired two-tailed Student’s t-test was performed using R. * P adj< 0.05, ** P adj < 0.01, *** P adj < 0.001, **** P adj < 0.0001.
	Table S5. Statistical analysis of the changes in IgG bisection between passages in the time-course experiments. Unpaired two-tailed Student’s t-test was performed using R. * P adj< 0.05, ** P adj < 0.01, *** P adj < 0.001, **** P adj < 0.0001.
	Table S6. Statistical analysis of the changes in IgG sialylation between passages in the time-course experiments. Unpaired two-tailed Student’s t-test was performed using R. * P adj< 0.05, ** P adj < 0.01, *** P adj < 0.001, **** P adj < 0.0001.
	Table S7. Statistical analysis of the changes in GP4 between passages in the time-course experiments. Unpaired two-tailed Student’s t-test was performed using R. * P adj< 0.05, ** P adj < 0.01, *** P adj < 0.001, **** P adj < 0.0001.
	Table S8. Statistical analysis of the changes in GP8 between passages in the time-course experiments. Unpaired two-tailed Student’s t-test was performed using R. * P adj< 0.05, ** P adj < 0.01, *** P adj < 0.001, **** P adj < 0.0001.
	Table S9. Statistical analysis of the changes in GP9 between passages in the time-course experiments. Unpaired two-tailed Student’s t-test was performed using R. * P adj< 0.05, ** P adj < 0.01, *** P adj < 0.001, **** P adj < 0.0001.
	Table S10. Statistical analysis of the changes in GP14 between passages in the time-course experiments. Unpaired two-tailed Student’s t-test was performed using R. * P adj< 0.05, ** P adj < 0.01, *** P adj < 0.001, **** P adj < 0.0001.

## Sheet: S1
	Derived trait	Trait description	Individual IgG glycans
	A	Percentage of agalactosylated glycans in total IgG glycome	GP1 + GP2 + GP3 + GP4 + GP5 + GP6
	G	Percentage of galactosylated glycans in total IgG glycome	GP7 + GP8 + GP9 + GP10 + GP11 + GP12 + GP13 + GP14 + GP15 + GP16 + GP17 + GP18 + GP19 + GP20 + GP21 + GP22 + GP23 + GP24
	S	Percentage of mono- and disialylated glycans in total IgG glycome	GP16 + GP17 + GP18 + GP19 + GP20 + GP21 + GP22 + GP23 + GP24
	F	Percentage of core fucosylated glycans in total IgG glycome	GP1 + GP4 + GP6 + GP8 + GP9 + GP10 + GP11 + GP14 + GP15 + GP16 + GP18 + GP19 + GP23 + GP24
	B	Percentage of glycans with bisecting GlcNAc in total IgG glycome	GP3 + GP6 + GP10 + GP11 + GP13 + GP15 + GP19 + GP22 + GP24

## Sheet: S2
EXP	Derived trait	group1	group2	n1	n2	statistic	df	p	p.adj	p.adj.signif
Experiment 1	Galactosylated glycans	p11	p15	6	6	22.9834	9.66054	9.32e-10	3.91e-08	****
Experiment 1	Galactosylated glycans	p11	p19	6	6	18.9989	7.82799	7.88e-08	2.92e-06	****
Experiment 1	Galactosylated glycans	p11	p23	6	6	43.5143	8.20094	5.42e-11	2.33e-09	****
Experiment 1	Galactosylated glycans	p11	p27	6	6	5.92319	6.16084	0.000938	0.009	**
Experiment 1	Galactosylated glycans	p11	p3	6	6	-8.0072	6.08563	0.000188	0.003	**
Experiment 1	Galactosylated glycans	p11	p31	6	6	13.8715	9.86609	8.54e-08	3.07e-06	****
Experiment 1	Galactosylated glycans	p11	p35	6	6	39.6366	9.87337	3.25e-12	1.46e-10	****
Experiment 1	Galactosylated glycans	p11	p39	6	6	10.8798	7.16251	1.04e-05	0.000229	***
Experiment 1	Galactosylated glycans	p11	p7	6	5	-4.97369	5.84973	0.003	0.016	*
Experiment 1	Galactosylated glycans	p15	p19	6	6	1.38505	8.75864	0.2	0.4	ns
Experiment 1	Galactosylated glycans	p15	p23	6	6	10.9052	7.33417	8.56e-06	0.000197	***
Experiment 1	Galactosylated glycans	p15	p27	6	6	-5.64222	6.67053	0.000924	0.009	**
Experiment 1	Galactosylated glycans	p15	p3	6	6	-18.9251	6.56534	5.66e-07	1.81e-05	****
Experiment 1	Galactosylated glycans	p15	p31	6	6	-9.20024	9.94766	3.52e-06	9.15e-05	****
Experiment 1	Galactosylated glycans	p15	p35	6	6	11.3591	9.20216	1.01e-06	2.93e-05	****
Experiment 1	Galactosylated glycans	p15	p39	6	6	-4.45524	7.9931	0.002	0.015	*
Experiment 1	Galactosylated glycans	p15	p7	6	5	-33.1475	5.58637	1.25e-07	4.37e-06	****
Experiment 1	Galactosylated glycans	p19	p23	6	6	6.19094	6.1083	0.000764	0.008	**
Experiment 1	Galactosylated glycans	p19	p27	6	6	-6.07606	8.31846	0.000254	0.004	**
Experiment 1	Galactosylated glycans	p19	p3	6	6	-18.3723	8.14899	6.39e-08	2.43e-06	****
Experiment 1	Galactosylated glycans	p19	p31	6	6	-8.58288	8.3961	1.95e-05	0.00041	***
Experiment 1	Galactosylated glycans	p19	p35	6	6	7.01512	7.32719	0.000169	0.003	**
Experiment 1	Galactosylated glycans	p19	p39	6	6	-4.99176	9.76957	0.000584	0.007	**
Experiment 1	Galactosylated glycans	p19	p7	6	5	-24.3072	5.26764	1.3e-06	3.51e-05	****
Experiment 1	Galactosylated glycans	p23	p27	6	6	-10.9297	5.42533	6.71e-05	0.001	**
Experiment 1	Galactosylated glycans	p23	p3	6	6	-24.7811	5.39717	9.09e-07	2.82e-05	****
Experiment 1	Galactosylated glycans	p23	p31	6	6	-23.4605	7.64763	2.11e-08	8.23e-07	****
Experiment 1	Galactosylated glycans	p23	p35	6	6	2.17651	8.76703	0.058	0.292	ns
Experiment 1	Galactosylated glycans	p23	p39	6	6	-11.6935	5.81789	2.93e-05	0.000553	***
Experiment 1	Galactosylated glycans	p23	p7	6	5	-83.5485	7.16787	5.59e-12	2.46e-10	****
Experiment 1	Galactosylated glycans	p27	p3	6	6	-10.4177	9.98821	1.1e-06	3.08e-05	****
Experiment 1	Galactosylated glycans	p27	p31	6	6	0.83772	6.45512	0.432	0.432	ns
Experiment 1	Galactosylated glycans	p27	p35	6	6	11.4396	5.9293	2.91e-05	0.000553	***
Experiment 1	Galactosylated glycans	p27	p39	6	6	1.95545	9.08172	0.082	0.328	ns
Experiment 1	Galactosylated glycans	p27	p7	6	5	-8.00006	5.10191	0.000448	0.006	**
Experiment 1	Galactosylated glycans	p3	p31	6	6	14.3873	6.36225	4.32e-06	0.000108	***
Experiment 1	Galactosylated glycans	p3	p35	6	6	24.9757	5.86854	3.49e-07	1.15e-05	****
Experiment 1	Galactosylated glycans	p3	p39	6	6	13.8062	8.91684	2.54e-07	8.64e-06	****
Experiment 1	Galactosylated glycans	p3	p7	6	5	6.68523	5.09515	0.001	0.009	**
Experiment 1	Galactosylated glycans	p31	p35	6	6	22.4726	9.51094	1.45e-09	5.8e-08	****
Experiment 1	Galactosylated glycans	p31	p39	6	6	1.85121	7.65488	0.103	0.328	ns
Experiment 1	Galactosylated glycans	p31	p7	6	5	-22.4212	5.67629	9.27e-07	2.82e-05	****
Experiment 1	Galactosylated glycans	p35	p39	6	6	-12.2217	6.75407	7.46e-06	0.000179	***
Experiment 1	Galactosylated glycans	p35	p7	6	5	-62.0459	6.05811	1e-09	4.1e-08	****
Experiment 1	Galactosylated glycans	p39	p7	6	5	-14.3852	5.19663	2.2e-05	0.00044	***
Experiment 2	Galactosylated glycans	p11	p15	6	6	2.80512	5.58982	0.033	0.134	ns
Experiment 2	Galactosylated glycans	p11	p19	6	6	2.67588	9.73833	0.024	0.119	ns
Experiment 2	Galactosylated glycans	p11	p23	6	6	15.1442	8.39276	2.18e-07	3.92e-06	****
Experiment 2	Galactosylated glycans	p11	p27	6	5	-30.2934	7.23078	6.94e-09	1.67e-07	****
Experiment 2	Galactosylated glycans	p11	p31	6	6	-35.1668	9.92771	9.45e-12	3.12e-10	****
Experiment 2	Galactosylated glycans	p11	p35	6	6	21.6923	9.93656	1.07e-09	2.78e-08	****
Experiment 2	Galactosylated glycans	p11	p39	6	6	-28.9252	9.9914	5.77e-11	1.67e-09	****
Experiment 2	Galactosylated glycans	p11	p7	6	6	-7.69761	7.63616	7.39e-05	0.000739	***
Experiment 2	Galactosylated glycans	p15	p19	6	6	-1.99167	5.4244	0.099	0.296	ns
Experiment 2	Galactosylated glycans	p15	p23	6	6	3.78484	6.47915	0.008	0.049	*
Experiment 2	Galactosylated glycans	p15	p27	6	5	-15.1602	6.26954	3.55e-06	5.32e-05	****
Experiment 2	Galactosylated glycans	p15	p31	6	6	-15.0197	5.69887	8.44e-06	0.000118	***
Experiment 2	Galactosylated glycans	p15	p35	6	6	4.19074	5.50302	0.007	0.049	*
Experiment 2	Galactosylated glycans	p15	p39	6	6	-12.5988	5.6252	2.46e-05	0.00032	***
Experiment 2	Galactosylated glycans	p15	p7	6	6	-6.24541	6.99071	0.000428	0.003	**
Experiment 2	Galactosylated glycans	p19	p23	6	6	13.8437	7.60443	1.15e-06	1.96e-05	****
Experiment 2	Galactosylated glycans	p19	p27	6	5	-33.7517	6.45776	1.66e-08	3.65e-07	****
Experiment 2	Galactosylated glycans	p19	p31	6	6	-40.2186	9.43019	7.2e-12	2.45e-10	****
Experiment 2	Galactosylated glycans	p19	p35	6	6	20.7585	9.92804	1.66e-09	4.15e-08	****
Experiment 2	Galactosylated glycans	p19	p39	6	6	-33.7612	9.64329	2.45e-11	7.6e-10	****
Experiment 2	Galactosylated glycans	p19	p7	6	6	-9.65612	6.9651	2.78e-05	0.000334	***
Experiment 2	Galactosylated glycans	p23	p27	6	5	-37.94	8.98352	3.15e-11	9.45e-10	****
Experiment 2	Galactosylated glycans	p23	p31	6	6	-41.641	8.819	1.97e-11	6.3e-10	****
Experiment 2	Galactosylated glycans	p23	p35	6	6	0.521038	7.99982	0.616	0.616	ns
Experiment 2	Galactosylated glycans	p23	p39	6	6	-36.8494	8.53933	1.03e-10	2.88e-09	****
Experiment 2	Galactosylated glycans	p23	p7	6	6	-18.2337	9.75946	7.29e-09	1.68e-07	****
Experiment 2	Galactosylated glycans	p27	p31	5	6	1.3139	7.65727	0.227	0.454	ns
Experiment 2	Galactosylated glycans	p27	p35	5	6	47.8328	6.84333	6.72e-10	1.81e-08	****
Experiment 2	Galactosylated glycans	p27	p39	5	6	7.11865	7.3766	0.000149	0.001	**
Experiment 2	Galactosylated glycans	p27	p7	5	6	15.9011	8.88707	7.83e-08	1.57e-06	****
Experiment 2	Galactosylated glycans	p31	p35	6	6	57.0966	9.73773	1.25e-13	4.5e-12	****
Experiment 2	Galactosylated glycans	p31	p39	6	6	6.99233	9.96859	3.81e-05	0.000419	***
Experiment 2	Galactosylated glycans	p31	p7	6	6	16.4563	8.03498	1.79e-07	3.4e-06	****
Experiment 2	Galactosylated glycans	p35	p39	6	6	-51.3702	9.88263	2.49e-13	8.72e-12	****
Experiment 2	Galactosylated glycans	p35	p7	6	6	-21.9644	7.29329	6.25e-08	1.31e-06	****
Experiment 2	Galactosylated glycans	p39	p7	6	6	11.7782	7.76958	3.14e-06	5.02e-05	****
Experiment 3	Galactosylated glycans	p11	p15	6	6	-1.75637	9.53621	0.111	0.888	ns
Experiment 3	Galactosylated glycans	p11	p19	6	6	-2.19083	6.00461	0.071	0.639	ns
Experiment 3	Galactosylated glycans	p11	p23	6	6	-13.2337	8.50433	5.74e-07	1.38e-05	****
Experiment 3	Galactosylated glycans	p11	p27	6	6	-15.3943	6.15919	3.78e-06	6.8e-05	****
Experiment 3	Galactosylated glycans	p11	p31	6	6	-11.3013	9.83582	5.94e-07	1.38e-05	****
Experiment 3	Galactosylated glycans	p11	p35	6	6	-2.94725	9.12501	0.016	0.193	ns
Experiment 3	Galactosylated glycans	p11	p39	6	6	-8.82927	9.95429	5.07e-06	8.62e-05	****
Experiment 3	Galactosylated glycans	p15	p19	6	6	-0.0592987	6.55013	0.954	1	ns
Experiment 3	Galactosylated glycans	p15	p23	6	6	-13.1507	9.54193	1.98e-07	5.15e-06	****
Experiment 3	Galactosylated glycans	p15	p27	6	6	-16.1292	6.77992	1.17e-06	2.34e-05	****
Experiment 3	Galactosylated glycans	p15	p31	6	6	-10.7736	9.91239	8.62e-07	1.88e-05	****
Experiment 3	Galactosylated glycans	p15	p35	6	6	-1.29092	9.90932	0.226	1	ns
Experiment 3	Galactosylated glycans	p15	p39	6	6	-7.99901	9.2534	1.88e-05	0.000282	***
Experiment 3	Galactosylated glycans	p19	p23	6	6	-18.7668	7.33723	1.81e-07	4.89e-06	****
Experiment 3	Galactosylated glycans	p19	p27	6	6	-29.8605	9.94675	4.57e-11	1.28e-09	****
Experiment 3	Galactosylated glycans	p19	p31	6	6	-13.6389	6.29372	6.57e-06	0.000105	***
Experiment 3	Galactosylated glycans	p19	p35	6	6	-1.69362	6.85667	0.135	0.945	ns
Experiment 3	Galactosylated glycans	p19	p39	6	6	-9.52237	5.87924	8.63e-05	0.001	**
Experiment 3	Galactosylated glycans	p23	p27	6	6	-0.778329	7.6538	0.46	1	ns
Experiment 3	Galactosylated glycans	p23	p31	6	6	0.615488	9.13973	0.553	1	ns
Experiment 3	Galactosylated glycans	p23	p35	6	6	12.4713	9.84352	2.37e-07	5.92e-06	****
Experiment 3	Galactosylated glycans	p23	p39	6	6	2.22709	8.16751	0.056	0.559	ns
Experiment 3	Galactosylated glycans	p27	p31	6	6	1.30844	6.48933	0.235	1	ns
Experiment 3	Galactosylated glycans	p27	p35	6	6	15.7327	7.12393	8.56e-07	1.88e-05	****
Experiment 3	Galactosylated glycans	p27	p39	6	6	2.97342	6.01536	0.025	0.273	ns
Experiment 3	Galactosylated glycans	p31	p35	6	6	10.0035	9.65868	2.08e-06	3.95e-05	****
Experiment 3	Galactosylated glycans	p31	p39	6	6	1.5227	9.63278	0.16	0.96	ns
Experiment 3	Galactosylated glycans	p35	p39	6	6	-7.18363	8.79777	5.81e-05	0.000813	***

## Sheet: S3
EXP	Derived trait	group1	group2	n1	n2	statistic	df	p	p.adj	p.adj.signif
Experiment 1	Agalactosylated glycans	p11	p15	6	6	-22.9834	9.66054	9.32e-10	3.91e-08	****
Experiment 1	Agalactosylated glycans	p11	p19	6	6	-18.9989	7.82799	7.88e-08	2.92e-06	****
Experiment 1	Agalactosylated glycans	p11	p23	6	6	-43.5143	8.20094	5.42e-11	2.33e-09	****
Experiment 1	Agalactosylated glycans	p11	p27	6	6	-5.92319	6.16084	0.000938	0.009	**
Experiment 1	Agalactosylated glycans	p11	p3	6	6	8.0072	6.08563	0.000188	0.003	**
Experiment 1	Agalactosylated glycans	p11	p31	6	6	-13.8715	9.86609	8.54e-08	3.07e-06	****
Experiment 1	Agalactosylated glycans	p11	p35	6	6	-39.6366	9.87337	3.25e-12	1.46e-10	****
Experiment 1	Agalactosylated glycans	p11	p39	6	6	-10.8798	7.16251	1.04e-05	0.000229	***
Experiment 1	Agalactosylated glycans	p11	p7	6	5	4.97369	5.84973	0.003	0.016	*
Experiment 1	Agalactosylated glycans	p15	p19	6	6	-1.38505	8.75864	0.2	0.4	ns
Experiment 1	Agalactosylated glycans	p15	p23	6	6	-10.9052	7.33417	8.56e-06	0.000197	***
Experiment 1	Agalactosylated glycans	p15	p27	6	6	5.64222	6.67053	0.000924	0.009	**
Experiment 1	Agalactosylated glycans	p15	p3	6	6	18.9251	6.56534	5.66e-07	1.81e-05	****
Experiment 1	Agalactosylated glycans	p15	p31	6	6	9.20024	9.94766	3.52e-06	9.15e-05	****
Experiment 1	Agalactosylated glycans	p15	p35	6	6	-11.3591	9.20216	1.01e-06	2.93e-05	****
Experiment 1	Agalactosylated glycans	p15	p39	6	6	4.45524	7.9931	0.002	0.015	*
Experiment 1	Agalactosylated glycans	p15	p7	6	5	33.1475	5.58637	1.25e-07	4.37e-06	****
Experiment 1	Agalactosylated glycans	p19	p23	6	6	-6.19094	6.1083	0.000764	0.008	**
Experiment 1	Agalactosylated glycans	p19	p27	6	6	6.07606	8.31846	0.000254	0.004	**
Experiment 1	Agalactosylated glycans	p19	p3	6	6	18.3723	8.14899	6.39e-08	2.43e-06	****
Experiment 1	Agalactosylated glycans	p19	p31	6	6	8.58288	8.3961	1.95e-05	0.00041	***
Experiment 1	Agalactosylated glycans	p19	p35	6	6	-7.01512	7.32719	0.000169	0.003	**
Experiment 1	Agalactosylated glycans	p19	p39	6	6	4.99176	9.76957	0.000584	0.007	**
Experiment 1	Agalactosylated glycans	p19	p7	6	5	24.3072	5.26764	1.3e-06	3.51e-05	****
Experiment 1	Agalactosylated glycans	p23	p27	6	6	10.9297	5.42533	6.71e-05	0.001	**
Experiment 1	Agalactosylated glycans	p23	p3	6	6	24.7811	5.39717	9.09e-07	2.82e-05	****
Experiment 1	Agalactosylated glycans	p23	p31	6	6	23.4605	7.64763	2.11e-08	8.23e-07	****
Experiment 1	Agalactosylated glycans	p23	p35	6	6	-2.17651	8.76703	0.058	0.292	ns
Experiment 1	Agalactosylated glycans	p23	p39	6	6	11.6935	5.81789	2.93e-05	0.000553	***
Experiment 1	Agalactosylated glycans	p23	p7	6	5	83.5485	7.16787	5.59e-12	2.46e-10	****
Experiment 1	Agalactosylated glycans	p27	p3	6	6	10.4177	9.98821	1.1e-06	3.08e-05	****
Experiment 1	Agalactosylated glycans	p27	p31	6	6	-0.83772	6.45512	0.432	0.432	ns
Experiment 1	Agalactosylated glycans	p27	p35	6	6	-11.4396	5.9293	2.91e-05	0.000553	***
Experiment 1	Agalactosylated glycans	p27	p39	6	6	-1.95545	9.08172	0.082	0.328	ns
Experiment 1	Agalactosylated glycans	p27	p7	6	5	8.00006	5.10191	0.000448	0.006	**
Experiment 1	Agalactosylated glycans	p3	p31	6	6	-14.3873	6.36225	4.32e-06	0.000108	***
Experiment 1	Agalactosylated glycans	p3	p35	6	6	-24.9757	5.86854	3.49e-07	1.15e-05	****
Experiment 1	Agalactosylated glycans	p3	p39	6	6	-13.8062	8.91684	2.54e-07	8.64e-06	****
Experiment 1	Agalactosylated glycans	p3	p7	6	5	-6.68523	5.09515	0.001	0.009	**
Experiment 1	Agalactosylated glycans	p31	p35	6	6	-22.4726	9.51094	1.45e-09	5.8e-08	****
Experiment 1	Agalactosylated glycans	p31	p39	6	6	-1.85121	7.65488	0.103	0.328	ns
Experiment 1	Agalactosylated glycans	p31	p7	6	5	22.4212	5.67629	9.27e-07	2.82e-05	****
Experiment 1	Agalactosylated glycans	p35	p39	6	6	12.2217	6.75407	7.46e-06	0.000179	***
Experiment 1	Agalactosylated glycans	p35	p7	6	5	62.0459	6.05811	1e-09	4.1e-08	****
Experiment 1	Agalactosylated glycans	p39	p7	6	5	14.3852	5.19663	2.2e-05	0.00044	***
Experiment 2	Agalactosylated glycans	p11	p15	6	6	-2.80512	5.58982	0.033	0.134	ns
Experiment 2	Agalactosylated glycans	p11	p19	6	6	-2.67588	9.73833	0.024	0.119	ns
Experiment 2	Agalactosylated glycans	p11	p23	6	6	-15.1442	8.39276	2.18e-07	3.92e-06	****
Experiment 2	Agalactosylated glycans	p11	p27	6	5	30.2934	7.23078	6.94e-09	1.67e-07	****
Experiment 2	Agalactosylated glycans	p11	p31	6	6	35.1668	9.92771	9.45e-12	3.12e-10	****
Experiment 2	Agalactosylated glycans	p11	p35	6	6	-21.6923	9.93656	1.07e-09	2.78e-08	****
Experiment 2	Agalactosylated glycans	p11	p39	6	6	28.9252	9.9914	5.77e-11	1.67e-09	****
Experiment 2	Agalactosylated glycans	p11	p7	6	6	7.69761	7.63616	7.39e-05	0.000739	***
Experiment 2	Agalactosylated glycans	p15	p19	6	6	1.99167	5.4244	0.099	0.296	ns
Experiment 2	Agalactosylated glycans	p15	p23	6	6	-3.78484	6.47915	0.008	0.049	*
Experiment 2	Agalactosylated glycans	p15	p27	6	5	15.1602	6.26954	3.55e-06	5.32e-05	****
Experiment 2	Agalactosylated glycans	p15	p31	6	6	15.0197	5.69887	8.44e-06	0.000118	***
Experiment 2	Agalactosylated glycans	p15	p35	6	6	-4.19074	5.50302	0.007	0.049	*
Experiment 2	Agalactosylated glycans	p15	p39	6	6	12.5988	5.6252	2.46e-05	0.00032	***
Experiment 2	Agalactosylated glycans	p15	p7	6	6	6.24541	6.99071	0.000428	0.003	**
Experiment 2	Agalactosylated glycans	p19	p23	6	6	-13.8437	7.60443	1.15e-06	1.96e-05	****
Experiment 2	Agalactosylated glycans	p19	p27	6	5	33.7517	6.45776	1.66e-08	3.65e-07	****
Experiment 2	Agalactosylated glycans	p19	p31	6	6	40.2186	9.43019	7.2e-12	2.45e-10	****
Experiment 2	Agalactosylated glycans	p19	p35	6	6	-20.7585	9.92804	1.66e-09	4.15e-08	****
Experiment 2	Agalactosylated glycans	p19	p39	6	6	33.7612	9.64329	2.45e-11	7.6e-10	****
Experiment 2	Agalactosylated glycans	p19	p7	6	6	9.65612	6.9651	2.78e-05	0.000334	***
Experiment 2	Agalactosylated glycans	p23	p27	6	5	37.94	8.98352	3.15e-11	9.45e-10	****
Experiment 2	Agalactosylated glycans	p23	p31	6	6	41.641	8.819	1.97e-11	6.3e-10	****
Experiment 2	Agalactosylated glycans	p23	p35	6	6	-0.521038	7.99982	0.616	0.616	ns
Experiment 2	Agalactosylated glycans	p23	p39	6	6	36.8494	8.53933	1.03e-10	2.88e-09	****
Experiment 2	Agalactosylated glycans	p23	p7	6	6	18.2337	9.75946	7.29e-09	1.68e-07	****
Experiment 2	Agalactosylated glycans	p27	p31	5	6	-1.3139	7.65727	0.227	0.454	ns
Experiment 2	Agalactosylated glycans	p27	p35	5	6	-47.8328	6.84333	6.72e-10	1.81e-08	****
Experiment 2	Agalactosylated glycans	p27	p39	5	6	-7.11865	7.3766	0.000149	0.001	**
Experiment 2	Agalactosylated glycans	p27	p7	5	6	-15.9011	8.88707	7.83e-08	1.57e-06	****
Experiment 2	Agalactosylated glycans	p31	p35	6	6	-57.0966	9.73773	1.25e-13	4.5e-12	****
Experiment 2	Agalactosylated glycans	p31	p39	6	6	-6.99233	9.96859	3.81e-05	0.000419	***
Experiment 2	Agalactosylated glycans	p31	p7	6	6	-16.4563	8.03498	1.79e-07	3.4e-06	****
Experiment 2	Agalactosylated glycans	p35	p39	6	6	51.3702	9.88263	2.49e-13	8.72e-12	****
Experiment 2	Agalactosylated glycans	p35	p7	6	6	21.9644	7.29329	6.25e-08	1.31e-06	****
Experiment 2	Agalactosylated glycans	p39	p7	6	6	-11.7782	7.76958	3.14e-06	5.02e-05	****
Experiment 3	Agalactosylated glycans	p11	p15	6	6	1.75637	9.53621	0.111	0.888	ns
Experiment 3	Agalactosylated glycans	p11	p19	6	6	2.19083	6.00461	0.071	0.639	ns
Experiment 3	Agalactosylated glycans	p11	p23	6	6	13.2337	8.50433	5.74e-07	1.38e-05	****
Experiment 3	Agalactosylated glycans	p11	p27	6	6	15.3943	6.15919	3.78e-06	6.8e-05	****
Experiment 3	Agalactosylated glycans	p11	p31	6	6	11.3013	9.83582	5.94e-07	1.38e-05	****
Experiment 3	Agalactosylated glycans	p11	p35	6	6	2.94725	9.12501	0.016	0.193	ns
Experiment 3	Agalactosylated glycans	p11	p39	6	6	8.82927	9.95429	5.07e-06	8.62e-05	****
Experiment 3	Agalactosylated glycans	p15	p19	6	6	0.0592987	6.55013	0.954	1	ns
Experiment 3	Agalactosylated glycans	p15	p23	6	6	13.1507	9.54193	1.98e-07	5.15e-06	****
Experiment 3	Agalactosylated glycans	p15	p27	6	6	16.1292	6.77992	1.17e-06	2.34e-05	****
Experiment 3	Agalactosylated glycans	p15	p31	6	6	10.7736	9.91239	8.62e-07	1.88e-05	****
Experiment 3	Agalactosylated glycans	p15	p35	6	6	1.29092	9.90932	0.226	1	ns
Experiment 3	Agalactosylated glycans	p15	p39	6	6	7.99901	9.2534	1.88e-05	0.000282	***
Experiment 3	Agalactosylated glycans	p19	p23	6	6	18.7668	7.33723	1.81e-07	4.89e-06	****
Experiment 3	Agalactosylated glycans	p19	p27	6	6	29.8605	9.94675	4.57e-11	1.28e-09	****
Experiment 3	Agalactosylated glycans	p19	p31	6	6	13.6389	6.29372	6.57e-06	0.000105	***
Experiment 3	Agalactosylated glycans	p19	p35	6	6	1.69362	6.85667	0.135	0.945	ns
Experiment 3	Agalactosylated glycans	p19	p39	6	6	9.52237	5.87924	8.63e-05	0.001	**
Experiment 3	Agalactosylated glycans	p23	p27	6	6	0.778329	7.6538	0.46	1	ns
Experiment 3	Agalactosylated glycans	p23	p31	6	6	-0.615488	9.13973	0.553	1	ns
Experiment 3	Agalactosylated glycans	p23	p35	6	6	-12.4713	9.84352	2.37e-07	5.92e-06	****
Experiment 3	Agalactosylated glycans	p23	p39	6	6	-2.22709	8.16751	0.056	0.559	ns
Experiment 3	Agalactosylated glycans	p27	p31	6	6	-1.30844	6.48933	0.235	1	ns
Experiment 3	Agalactosylated glycans	p27	p35	6	6	-15.7327	7.12393	8.56e-07	1.88e-05	****
Experiment 3	Agalactosylated glycans	p27	p39	6	6	-2.97342	6.01536	0.025	0.273	ns
Experiment 3	Agalactosylated glycans	p31	p35	6	6	-10.0035	9.65868	2.08e-06	3.95e-05	****
Experiment 3	Agalactosylated glycans	p31	p39	6	6	-1.5227	9.63278	0.16	0.96	ns
Experiment 3	Agalactosylated glycans	p35	p39	6	6	7.18363	8.79777	5.81e-05	0.000813	***

## Sheet: S4
EXP	Derived trait	group1	group2	n1	n2	statistic	df	p	p.adj	p.adj.signif
Experiment 1	Core fucosylation	p11	p15	6	6	1.99866	7.48189	0.083	1	ns
Experiment 1	Core fucosylation	p11	p19	6	6	3.78408	6.79143	0.007	0.203	ns
Experiment 1	Core fucosylation	p11	p23	6	6	9.31008	9.31158	5.09e-06	0.000224	***
Experiment 1	Core fucosylation	p11	p27	6	6	0.369879	8.4232	0.721	1	ns
Experiment 1	Core fucosylation	p11	p3	6	6	-3.04131	7.87275	0.016	0.405	ns
Experiment 1	Core fucosylation	p11	p31	6	6	2.4142	8.87661	0.039	0.707	ns
Experiment 1	Core fucosylation	p11	p35	6	6	1.82554	6.92401	0.111	1	ns
Experiment 1	Core fucosylation	p11	p39	6	6	4.74189	6.3469	0.003	0.09	ns
Experiment 1	Core fucosylation	p11	p7	6	5	-2.72762	7.28322	0.028	0.538	ns
Experiment 1	Core fucosylation	p15	p19	6	6	1.72092	9.69185	0.117	1	ns
Experiment 1	Core fucosylation	p15	p23	6	6	4.71503	8.81891	0.001	0.044	*
Experiment 1	Core fucosylation	p15	p27	6	6	-1.46255	9.62679	0.175	1	ns
Experiment 1	Core fucosylation	p15	p3	6	6	-4.01526	9.92595	0.002	0.085	ns
Experiment 1	Core fucosylation	p15	p31	6	6	-0.0447956	9.25974	0.965	1	ns
Experiment 1	Core fucosylation	p15	p35	6	6	0.0366608	9.80549	0.971	1	ns
Experiment 1	Core fucosylation	p15	p39	6	6	2.79418	9.07706	0.021	0.435	ns
Experiment 1	Core fucosylation	p15	p7	6	5	-3.70037	5.66802	0.011	0.302	ns
Experiment 1	Core fucosylation	p19	p23	6	6	2.19233	7.9299	0.06	1	ns
Experiment 1	Core fucosylation	p19	p27	6	6	-3.15361	8.83867	0.012	0.309	ns
Experiment 1	Core fucosylation	p19	p3	6	6	-5.39205	9.36375	0.000382	0.015	*
Experiment 1	Core fucosylation	p19	p31	6	6	-1.94135	8.38465	0.086	1	ns
Experiment 1	Core fucosylation	p19	p35	6	6	-1.58189	9.98525	0.145	1	ns
Experiment 1	Core fucosylation	p19	p39	6	6	1.1456	9.78272	0.279	1	ns
Experiment 1	Core fucosylation	p19	p7	6	5	-5.31107	5.46842	0.002	0.084	ns
Experiment 1	Core fucosylation	p23	p27	6	6	-7.12938	9.67872	3.77e-05	0.002	**
Experiment 1	Core fucosylation	p23	p3	6	6	-9.76279	9.23058	3.62e-06	0.000163	***
Experiment 1	Core fucosylation	p23	p31	6	6	-5.69522	9.91458	0.000206	0.008	**
Experiment 1	Core fucosylation	p23	p35	6	6	-4.22016	8.11499	0.003	0.09	ns
Experiment 1	Core fucosylation	p23	p39	6	6	-0.592074	7.26693	0.572	1	ns
Experiment 1	Core fucosylation	p23	p7	6	5	-13.0653	6.39598	7.51e-06	0.000323	***
Experiment 1	Core fucosylation	p27	p3	6	6	-2.89311	9.87516	0.016	0.405	ns
Experiment 1	Core fucosylation	p27	p31	6	6	1.65415	9.91803	0.129	1	ns
Experiment 1	Core fucosylation	p27	p35	6	6	1.3768	9.02532	0.202	1	ns
Experiment 1	Core fucosylation	p27	p39	6	6	4.13609	8.0938	0.003	0.096	ns
Experiment 1	Core fucosylation	p27	p7	6	5	-2.24909	5.98455	0.066	1	ns
Experiment 1	Core fucosylation	p3	p31	6	6	4.55691	9.61061	0.001	0.044	*
Experiment 1	Core fucosylation	p3	p35	6	6	3.73732	9.52025	0.004	0.122	ns
Experiment 1	Core fucosylation	p3	p39	6	6	6.14216	8.65399	0.0002	0.008	**
Experiment 1	Core fucosylation	p3	p7	6	5	1.70394	5.79118	0.141	1	ns
Experiment 1	Core fucosylation	p31	p35	6	6	0.0814371	8.57673	0.937	1	ns
Experiment 1	Core fucosylation	p31	p39	6	6	3.06636	7.66548	0.016	0.405	ns
Experiment 1	Core fucosylation	p31	p7	6	5	-4.75858	6.17195	0.003	0.09	ns
Experiment 1	Core fucosylation	p35	p39	6	6	2.61918	9.66422	0.026	0.526	ns
Experiment 1	Core fucosylation	p35	p7	6	5	-3.28402	5.50539	0.019	0.418	ns
Experiment 1	Core fucosylation	p39	p7	6	5	-6.08321	5.34788	0.001	0.049	*
Experiment 2	Core fucosylation	p11	p15	6	6	-2.58519	5.8284	0.043	1	ns
Experiment 2	Core fucosylation	p11	p19	6	6	1.52704	7.06372	0.17	1	ns
Experiment 2	Core fucosylation	p11	p23	6	6	-1.27799	5.64992	0.251	1	ns
Experiment 2	Core fucosylation	p11	p27	6	5	1.46957	4.1416	0.213	1	ns
Experiment 2	Core fucosylation	p11	p31	6	6	0.113974	5.29512	0.913	1	ns
Experiment 2	Core fucosylation	p11	p35	6	6	1.8589	5.86632	0.114	1	ns
Experiment 2	Core fucosylation	p11	p39	6	6	0.644776	6.76116	0.54	1	ns
Experiment 2	Core fucosylation	p11	p7	6	6	-1.35896	5.53596	0.227	1	ns
Experiment 2	Core fucosylation	p15	p19	6	6	3.17429	8.36064	0.012	0.434	ns
Experiment 2	Core fucosylation	p15	p23	6	6	0.794844	9.85322	0.445	1	ns
Experiment 2	Core fucosylation	p15	p27	6	5	2.47179	5.67083	0.051	1	ns
Experiment 2	Core fucosylation	p15	p31	6	6	1.47542	8.14651	0.178	1	ns
Experiment 2	Core fucosylation	p15	p35	6	6	3.27916	9.99485	0.008	0.299	ns
Experiment 2	Core fucosylation	p15	p39	6	6	2.62116	8.78837	0.028	0.962	ns
Experiment 2	Core fucosylation	p15	p7	6	6	0.596575	9.55316	0.565	1	ns
Experiment 2	Core fucosylation	p19	p23	6	6	-1.96708	7.76888	0.086	1	ns
Experiment 2	Core fucosylation	p19	p27	6	5	0.96224	4.65639	0.383	1	ns
Experiment 2	Core fucosylation	p19	p31	6	6	-0.475583	6.3424	0.65	1	ns
Experiment 2	Core fucosylation	p19	p35	6	6	0.732391	8.47394	0.484	1	ns
Experiment 2	Core fucosylation	p19	p39	6	6	-0.622172	9.9273	0.548	1	ns
Experiment 2	Core fucosylation	p19	p7	6	6	-1.99998	7.34334	0.084	1	ns
Experiment 2	Core fucosylation	p23	p27	6	5	1.92397	6.10156	0.102	1	ns
Experiment 2	Core fucosylation	p23	p31	6	6	0.832211	8.75628	0.427	1	ns
Experiment 2	Core fucosylation	p23	p35	6	6	2.26558	9.79586	0.047	1	ns
Experiment 2	Core fucosylation	p23	p39	6	6	1.49178	8.17827	0.173	1	ns
Experiment 2	Core fucosylation	p23	p7	6	6	-0.146626	9.90721	0.886	1	ns
Experiment 2	Core fucosylation	p27	p31	5	6	-1.10188	7.94351	0.303	1	ns
Experiment 2	Core fucosylation	p27	p35	5	6	-0.55659	5.59998	0.599	1	ns
Experiment 2	Core fucosylation	p27	p39	5	6	-1.20678	4.77873	0.284	1	ns
Experiment 2	Core fucosylation	p27	p7	5	6	-1.97999	6.50058	0.091	1	ns
Experiment 2	Core fucosylation	p31	p35	6	6	0.874672	8.03616	0.407	1	ns
Experiment 2	Core fucosylation	p31	p39	6	6	0.15471	6.58176	0.882	1	ns
Experiment 2	Core fucosylation	p31	p7	6	6	-0.923662	9.22076	0.379	1	ns
Experiment 2	Core fucosylation	p35	p39	6	6	-1.19428	8.9	0.263	1	ns
Experiment 2	Core fucosylation	p35	p7	6	6	-2.29405	9.46472	0.046	1	ns
Experiment 2	Core fucosylation	p39	p7	6	6	-1.56042	7.71707	0.159	1	ns
Experiment 3	Core fucosylation	p11	p15	6	6	-0.57503	9.99912	0.578	1	ns
Experiment 3	Core fucosylation	p11	p19	6	6	-1.42616	7.45894	0.194	1	ns
Experiment 3	Core fucosylation	p11	p23	6	6	-4.03438	9.80622	0.002	0.04	*
Experiment 3	Core fucosylation	p11	p27	6	6	-5.89733	6.75902	0.000684	0.014	*
Experiment 3	Core fucosylation	p11	p31	6	6	-6.84027	6.1497	0.000432	0.01	*
Experiment 3	Core fucosylation	p11	p35	6	6	-6.4306	6.71596	0.000424	0.01	*
Experiment 3	Core fucosylation	p11	p39	6	6	-7.14972	5.84515	0.000424	0.01	*
Experiment 3	Core fucosylation	p15	p19	6	6	-0.693909	7.41895	0.509	1	ns
Experiment 3	Core fucosylation	p15	p23	6	6	-3.39903	9.78062	0.007	0.098	ns
Experiment 3	Core fucosylation	p15	p27	6	6	-5.10492	6.72833	0.002	0.027	*
Experiment 3	Core fucosylation	p15	p31	6	6	-6.01615	6.12887	0.000879	0.017	*
Experiment 3	Core fucosylation	p15	p35	6	6	-5.63228	6.68592	0.000926	0.017	*
Experiment 3	Core fucosylation	p15	p39	6	6	-6.31047	5.82964	0.000826	0.017	*
Experiment 3	Core fucosylation	p19	p23	6	6	-3.70934	8.11027	0.006	0.087	ns
Experiment 3	Core fucosylation	p19	p27	6	6	-7.21089	9.67738	3.44e-05	0.00086	***
Experiment 3	Core fucosylation	p19	p31	6	6	-9.13218	8.70479	9.51e-06	0.000266	***
Experiment 3	Core fucosylation	p19	p35	6	6	-8.10254	9.63248	1.33e-05	0.000346	***
Experiment 3	Core fucosylation	p19	p39	6	6	-9.90821	7.93085	9.67e-06	0.000266	***
Experiment 3	Core fucosylation	p23	p27	6	6	-1.10485	7.279	0.304	1	ns
Experiment 3	Core fucosylation	p23	p31	6	6	-2.02145	6.5104	0.086	0.946	ns
Experiment 3	Core fucosylation	p23	p35	6	6	-1.69407	7.22585	0.133	1	ns
Experiment 3	Core fucosylation	p23	p39	6	6	-2.29916	6.11551	0.06	0.785	ns
Experiment 3	Core fucosylation	p27	p31	6	6	-1.49613	9.54416	0.167	1	ns
Experiment 3	Core fucosylation	p27	p35	6	6	-0.944495	9.99825	0.367	1	ns
Experiment 3	Core fucosylation	p27	p39	6	6	-2.00757	8.84165	0.076	0.914	ns
Experiment 3	Core fucosylation	p31	p35	6	6	0.464051	9.59321	0.653	1	ns
Experiment 3	Core fucosylation	p31	p39	6	6	-0.489858	9.76322	0.635	1	ns
Experiment 3	Core fucosylation	p35	p39	6	6	-0.920748	8.90638	0.381	1	ns

## Sheet: S5
EXP	Derived trait	group1	group2	n1	n2	statistic	df	p	p.adj	p.adj.signif
Experiment 1	Bisecting GlcNAc	p11	p15	6	6	2.65968	7.76931	0.03	0.858	ns
Experiment 1	Bisecting GlcNAc	p11	p19	6	6	-0.164049	7.73178	0.874	1	ns
Experiment 1	Bisecting GlcNAc	p11	p23	6	6	7.6892	9.9966	1.67e-05	0.000752	***
Experiment 1	Bisecting GlcNAc	p11	p27	6	6	2.16846	6.61409	0.069	1	ns
Experiment 1	Bisecting GlcNAc	p11	p3	6	6	0.79882	7.99398	0.447	1	ns
Experiment 1	Bisecting GlcNAc	p11	p31	6	6	1.09238	8.6729	0.304	1	ns
Experiment 1	Bisecting GlcNAc	p11	p35	6	6	6.69896	9.64045	6.4e-05	0.003	**
Experiment 1	Bisecting GlcNAc	p11	p39	6	6	-2.26555	6.46221	0.061	1	ns
Experiment 1	Bisecting GlcNAc	p11	p7	6	5	1.63297	7.1879	0.145	1	ns
Experiment 1	Bisecting GlcNAc	p15	p19	6	6	-2.27001	9.99933	0.047	1	ns
Experiment 1	Bisecting GlcNAc	p15	p23	6	6	2.54199	7.68493	0.036	0.964	ns
Experiment 1	Bisecting GlcNAc	p15	p27	6	6	0.0747574	9.21754	0.942	1	ns
Experiment 1	Bisecting GlcNAc	p15	p3	6	6	-1.56043	9.97731	0.15	1	ns
Experiment 1	Bisecting GlcNAc	p15	p31	6	6	-1.49716	9.67589	0.166	1	ns
Experiment 1	Bisecting GlcNAc	p15	p35	6	6	2.29699	8.72503	0.048	1	ns
Experiment 1	Bisecting GlcNAc	p15	p39	6	6	-3.73283	8.974	0.005	0.155	ns
Experiment 1	Bisecting GlcNAc	p15	p7	6	5	-1.96396	5.72034	0.1	1	ns
Experiment 1	Bisecting GlcNAc	p19	p23	6	6	5.34472	7.64808	0.000801	0.031	*
Experiment 1	Bisecting GlcNAc	p19	p27	6	6	1.98774	9.25431	0.077	1	ns
Experiment 1	Bisecting GlcNAc	p19	p3	6	6	0.769326	9.96891	0.46	1	ns
Experiment 1	Bisecting GlcNAc	p19	p31	6	6	0.977258	9.64837	0.352	1	ns
Experiment 1	Bisecting GlcNAc	p19	p35	6	6	4.94872	8.68437	0.000881	0.033	*
Experiment 1	Bisecting GlcNAc	p19	p39	6	6	-1.87336	9.01326	0.094	1	ns
Experiment 1	Bisecting GlcNAc	p19	p7	6	5	1.13896	5.70893	0.3	1	ns
Experiment 1	Bisecting GlcNAc	p23	p27	6	6	-1.90051	6.55857	0.102	1	ns
Experiment 1	Bisecting GlcNAc	p23	p3	6	6	-4.60457	7.90606	0.002	0.063	ns
Experiment 1	Bisecting GlcNAc	p23	p31	6	6	-4.87968	8.58075	0.001	0.037	*
Experiment 1	Bisecting GlcNAc	p23	p35	6	6	-0.146176	9.57444	0.887	1	ns
Experiment 1	Bisecting GlcNAc	p23	p39	6	6	-6.16586	6.41141	0.000649	0.026	*
Experiment 1	Bisecting GlcNAc	p23	p7	6	5	-8.15488	7.25571	6.61e-05	0.003	**
Experiment 1	Bisecting GlcNAc	p27	p3	6	6	-1.38054	8.99422	0.201	1	ns
Experiment 1	Bisecting GlcNAc	p27	p31	6	6	-1.30723	8.31376	0.226	1	ns
Experiment 1	Bisecting GlcNAc	p27	p35	6	6	1.75081	7.31327	0.122	1	ns
Experiment 1	Bisecting GlcNAc	p27	p39	6	6	-3.37364	9.97315	0.007	0.227	ns
Experiment 1	Bisecting GlcNAc	p27	p7	6	5	-1.56901	5.3988	0.173	1	ns
Experiment 1	Bisecting GlcNAc	p3	p31	6	6	0.165503	9.81704	0.872	1	ns
Experiment 1	Bisecting GlcNAc	p3	p35	6	6	4.22441	8.95948	0.002	0.076	ns
Experiment 1	Bisecting GlcNAc	p3	p39	6	6	-2.53099	8.73996	0.033	0.921	ns
Experiment 1	Bisecting GlcNAc	p3	p7	6	5	0.122503	5.79066	0.907	1	ns
Experiment 1	Bisecting GlcNAc	p31	p35	6	6	4.41584	9.56117	0.001	0.052	ns
Experiment 1	Bisecting GlcNAc	p31	p39	6	6	-2.75799	8.05892	0.025	0.763	ns
Experiment 1	Bisecting GlcNAc	p31	p7	6	5	-0.100594	6.03125	0.923	1	ns
Experiment 1	Bisecting GlcNAc	p35	p39	6	6	-5.88842	7.1075	0.000573	0.023	*
Experiment 1	Bisecting GlcNAc	p35	p7	6	5	-6.65245	6.55209	0.000385	0.016	*
Experiment 1	Bisecting GlcNAc	p39	p7	6	5	3.07746	5.35977	0.025	0.763	ns
Experiment 2	Bisecting GlcNAc	p11	p15	6	6	1.26983	5.52124	0.255	1	ns
Experiment 2	Bisecting GlcNAc	p11	p19	6	6	-3.5736	6.31533	0.011	0.346	ns
Experiment 2	Bisecting GlcNAc	p11	p23	6	6	-0.960017	5.73872	0.376	1	ns
Experiment 2	Bisecting GlcNAc	p11	p27	6	5	-1.17508	4.20106	0.302	1	ns
Experiment 2	Bisecting GlcNAc	p11	p31	6	6	-0.142781	5.40971	0.892	1	ns
Experiment 2	Bisecting GlcNAc	p11	p35	6	6	-3.55445	5.53011	0.014	0.415	ns
Experiment 2	Bisecting GlcNAc	p11	p39	6	6	-2.92913	6.58636	0.024	0.684	ns
Experiment 2	Bisecting GlcNAc	p11	p7	6	6	1.9934	5.66512	0.096	1	ns
Experiment 2	Bisecting GlcNAc	p15	p19	6	6	-3.12103	8.38746	0.013	0.415	ns
Experiment 2	Bisecting GlcNAc	p15	p23	6	6	-1.63745	9.70629	0.134	1	ns
Experiment 2	Bisecting GlcNAc	p15	p27	6	5	-1.71974	7.39749	0.127	1	ns
Experiment 2	Bisecting GlcNAc	p15	p31	6	6	-0.972916	9.8573	0.354	1	ns
Experiment 2	Bisecting GlcNAc	p15	p35	6	6	-3.49332	9.99928	0.006	0.197	ns
Experiment 2	Bisecting GlcNAc	p15	p39	6	6	-2.69032	7.90986	0.028	0.778	ns
Experiment 2	Bisecting GlcNAc	p15	p7	6	6	0.388382	9.85304	0.706	1	ns
Experiment 2	Bisecting GlcNAc	p19	p23	6	6	1.47509	9.24214	0.173	1	ns
Experiment 2	Bisecting GlcNAc	p19	p27	6	5	0.41969	5.48508	0.691	1	ns
Experiment 2	Bisecting GlcNAc	p19	p31	6	6	1.7157	7.80193	0.126	1	ns
Experiment 2	Bisecting GlcNAc	p19	p35	6	6	-1.05749	8.42977	0.32	1	ns
Experiment 2	Bisecting GlcNAc	p19	p39	6	6	0.697249	9.9057	0.502	1	ns
Experiment 2	Bisecting GlcNAc	p19	p7	6	6	3.87717	8.99509	0.004	0.131	ns
Experiment 2	Bisecting GlcNAc	p23	p27	6	5	-0.528719	6.5592	0.614	1	ns
Experiment 2	Bisecting GlcNAc	p23	p31	6	6	0.476673	9.23291	0.645	1	ns
Experiment 2	Bisecting GlcNAc	p23	p35	6	6	-2.14219	9.73272	0.059	1	ns
Experiment 2	Bisecting GlcNAc	p23	p39	6	6	-0.943275	8.77581	0.371	1	ns
Experiment 2	Bisecting GlcNAc	p23	p7	6	6	2.17863	9.97204	0.054	1	ns
Experiment 2	Bisecting GlcNAc	p27	p31	5	6	0.847563	7.99456	0.421	1	ns
Experiment 2	Bisecting GlcNAc	p27	p35	5	6	-1.08464	7.35517	0.312	1	ns
Experiment 2	Bisecting GlcNAc	p27	p39	5	6	-0.0464849	5.22792	0.965	1	ns
Experiment 2	Bisecting GlcNAc	p27	p7	5	6	2.09012	6.8005	0.076	1	ns
Experiment 2	Bisecting GlcNAc	p31	p35	6	6	-2.29823	9.83713	0.045	1	ns
Experiment 2	Bisecting GlcNAc	p31	p39	6	6	-1.28694	7.36971	0.237	1	ns
Experiment 2	Bisecting GlcNAc	p31	p7	6	6	1.38475	9.45994	0.198	1	ns
Experiment 2	Bisecting GlcNAc	p35	p39	6	6	1.60021	7.95015	0.148	1	ns
Experiment 2	Bisecting GlcNAc	p35	p7	6	6	4.09264	9.87224	0.002	0.08	ns
Experiment 2	Bisecting GlcNAc	p39	p7	6	6	3.4374	8.51159	0.008	0.266	ns
Experiment 3	Bisecting GlcNAc	p11	p15	6	6	0.728333	9.8688	0.483	1	ns
Experiment 3	Bisecting GlcNAc	p11	p19	6	6	1.30391	8.77969	0.225	1	ns
Experiment 3	Bisecting GlcNAc	p11	p23	6	6	-2.92187	9.21422	0.017	0.315	ns
Experiment 3	Bisecting GlcNAc	p11	p27	6	6	-2.66282	9.41529	0.025	0.425	ns
Experiment 3	Bisecting GlcNAc	p11	p31	6	6	-2.0979	9.83778	0.063	0.815	ns
Experiment 3	Bisecting GlcNAc	p11	p35	6	6	0.440945	9.698	0.669	1	ns
Experiment 3	Bisecting GlcNAc	p11	p39	6	6	-2.33656	7.72148	0.049	0.683	ns
Experiment 3	Bisecting GlcNAc	p15	p19	6	6	0.535289	9.32483	0.605	1	ns
Experiment 3	Bisecting GlcNAc	p15	p23	6	6	-3.9812	9.67636	0.003	0.069	ns
Experiment 3	Bisecting GlcNAc	p15	p27	6	6	-3.67943	9.81348	0.004	0.101	ns
Experiment 3	Bisecting GlcNAc	p15	p31	6	6	-3.01161	9.99823	0.013	0.275	ns
Experiment 3	Bisecting GlcNAc	p15	p35	6	6	-0.193325	9.24414	0.851	1	ns
Experiment 3	Bisecting GlcNAc	p15	p39	6	6	-3.48322	8.27537	0.008	0.173	ns
Experiment 3	Bisecting GlcNAc	p19	p23	6	6	-5.19662	9.91848	0.000414	0.012	*
Experiment 3	Bisecting GlcNAc	p19	p27	6	6	-4.80599	9.81768	0.000755	0.02	*
Experiment 3	Bisecting GlcNAc	p19	p31	6	6	-3.93858	9.38181	0.003	0.076	ns
Experiment 3	Bisecting GlcNAc	p19	p35	6	6	-0.645733	7.90131	0.537	1	ns
Experiment 3	Bisecting GlcNAc	p19	p39	6	6	-4.8795	9.56335	0.000731	0.02	*
Experiment 3	Bisecting GlcNAc	p23	p27	6	6	0.248154	9.97871	0.809	1	ns
Experiment 3	Bisecting GlcNAc	p23	p31	6	6	0.73305	9.71915	0.481	1	ns
Experiment 3	Bisecting GlcNAc	p23	p35	6	6	3.07455	8.34377	0.015	0.29	ns
Experiment 3	Bisecting GlcNAc	p23	p39	6	6	1.06168	9.18159	0.316	1	ns
Experiment 3	Bisecting GlcNAc	p27	p31	6	6	0.491776	9.84667	0.634	1	ns
Experiment 3	Bisecting GlcNAc	p27	p35	6	6	2.84737	8.57449	0.02	0.362	ns
Experiment 3	Bisecting GlcNAc	p27	p39	6	6	0.74894	8.9635	0.473	1	ns
Experiment 3	Bisecting GlcNAc	p31	p35	6	6	2.34579	9.18378	0.043	0.646	ns
Experiment 3	Bisecting GlcNAc	p31	p39	6	6	0.128671	8.34139	0.901	1	ns
Experiment 3	Bisecting GlcNAc	p35	p39	6	6	-2.5488	6.98667	0.038	0.611	ns

## Sheet: S6
EXP	Derived trait	group1	group2	n1	n2	statistic	df	p	p.adj	p.adj.signif
Experiment 1	Sialylated glycans	p11	p15	6	6	1.35834	6.87903	0.217	1	ns
Experiment 1	Sialylated glycans	p11	p19	6	6	-1.33797	6.0687	0.229	1	ns
Experiment 1	Sialylated glycans	p11	p23	6	6	1.16983	5.70111	0.289	1	ns
Experiment 1	Sialylated glycans	p11	p27	6	6	8.10875	9.74395	1.23e-05	0.000492	***
Experiment 1	Sialylated glycans	p11	p3	6	6	3.61856	9.99748	0.005	0.119	ns
Experiment 1	Sialylated glycans	p11	p31	6	6	4.18862	9.94293	0.002	0.053	ns
Experiment 1	Sialylated glycans	p11	p35	6	6	8.9181	9.82747	5.07e-06	0.000223	***
Experiment 1	Sialylated glycans	p11	p39	6	5	-12.1048	5.17999	5.38e-05	0.002	**
Experiment 1	Sialylated glycans	p11	p7	6	5	0.407226	5.43435	0.699	1	ns
Experiment 1	Sialylated glycans	p15	p19	6	6	-2.01649	9.24025	0.074	1	ns
Experiment 1	Sialylated glycans	p15	p23	6	6	0.272446	8.19538	0.792	1	ns
Experiment 1	Sialylated glycans	p15	p27	6	6	3.59122	7.52075	0.008	0.18	ns
Experiment 1	Sialylated glycans	p15	p3	6	6	0.723788	6.93497	0.493	1	ns
Experiment 1	Sialylated glycans	p15	p31	6	6	0.960079	6.63	0.371	1	ns
Experiment 1	Sialylated glycans	p15	p35	6	6	4.01341	7.39129	0.005	0.119	ns
Experiment 1	Sialylated glycans	p15	p39	6	5	-10.7559	8.46991	3.16e-06	0.000142	***
Experiment 1	Sialylated glycans	p15	p7	6	5	-0.710963	8.80144	0.496	1	ns
Experiment 1	Sialylated glycans	p19	p23	6	6	1.82647	9.5742	0.099	1	ns
Experiment 1	Sialylated glycans	p19	p27	6	6	5.15477	6.46656	0.002	0.049	*
Experiment 1	Sialylated glycans	p19	p3	6	6	2.94466	6.10232	0.025	0.531	ns
Experiment 1	Sialylated glycans	p19	p31	6	6	3.14361	5.92095	0.02	0.447	ns
Experiment 1	Sialylated glycans	p19	p35	6	6	5.48652	6.3839	0.001	0.038	*
Experiment 1	Sialylated glycans	p19	p39	6	5	-7.35761	8.98219	4.34e-05	0.002	**
Experiment 1	Sialylated glycans	p19	p7	6	5	1.3848	8.82432	0.2	1	ns
Experiment 1	Sialylated glycans	p23	p27	6	6	2.01871	5.96798	0.09	1	ns
Experiment 1	Sialylated glycans	p23	p3	6	6	0.153452	5.72348	0.883	1	ns
Experiment 1	Sialylated glycans	p23	p31	6	6	0.296792	5.60313	0.777	1	ns
Experiment 1	Sialylated glycans	p23	p35	6	6	2.2814	5.91211	0.063	1	ns
Experiment 1	Sialylated glycans	p23	p39	6	5	-8.36324	8.49023	2.22e-05	0.000866	***
Experiment 1	Sialylated glycans	p23	p7	6	5	-0.792275	8.11669	0.451	1	ns
Experiment 1	Sialylated glycans	p27	p3	6	6	-4.73796	9.78956	0.000842	0.027	*
Experiment 1	Sialylated glycans	p27	p31	6	6	-4.54836	9.47672	0.001	0.038	*
Experiment 1	Sialylated glycans	p27	p35	6	6	0.617529	9.99085	0.551	1	ns
Experiment 1	Sialylated glycans	p27	p39	6	5	-16.2026	5.62007	6.23e-06	0.000266	***
Experiment 1	Sialylated glycans	p27	p7	6	5	-4.36647	5.957	0.005	0.119	ns
Experiment 1	Sialylated glycans	p3	p31	6	6	0.40188	9.91694	0.696	1	ns
Experiment 1	Sialylated glycans	p3	p35	6	6	5.48252	9.86524	0.000281	0.01	**
Experiment 1	Sialylated glycans	p3	p39	6	5	-13.9275	5.21724	2.51e-05	0.000954	***
Experiment 1	Sialylated glycans	p3	p7	6	5	-1.60693	5.47898	0.164	1	ns
Experiment 1	Sialylated glycans	p31	p35	6	6	5.32186	9.59218	0.000388	0.013	*
Experiment 1	Sialylated glycans	p31	p39	6	5	-14.285	5.01628	2.96e-05	0.001	**
Experiment 1	Sialylated glycans	p31	p7	6	5	-1.84713	5.23748	0.121	1	ns
Experiment 1	Sialylated glycans	p35	p39	6	5	-16.6409	5.52879	6.19e-06	0.000266	***
Experiment 1	Sialylated glycans	p35	p7	6	5	-4.77986	5.8495	0.003	0.089	ns
Experiment 1	Sialylated glycans	p39	p7	5	5	9.91443	7.92099	9.71e-06	0.000398	***
Experiment 2	Sialylated glycans	p11	p15	6	6	2.00698	9.62567	0.074	1	ns
Experiment 2	Sialylated glycans	p11	p19	6	6	1.09653	8.26197	0.304	1	ns
Experiment 2	Sialylated glycans	p11	p23	6	6	-1.17409	7.78224	0.275	1	ns
Experiment 2	Sialylated glycans	p11	p27	6	5	-1.35579	7.90678	0.213	1	ns
Experiment 2	Sialylated glycans	p11	p31	6	6	-2.41846	8.1098	0.042	0.874	ns
Experiment 2	Sialylated glycans	p11	p35	6	6	1.71182	8.59993	0.123	1	ns
Experiment 2	Sialylated glycans	p11	p39	6	6	-8.29294	9.18475	1.46e-05	0.000496	***
Experiment 2	Sialylated glycans	p11	p7	6	6	1.32543	7.64451	0.223	1	ns
Experiment 2	Sialylated glycans	p15	p19	6	6	-0.265142	7.34348	0.798	1	ns
Experiment 2	Sialylated glycans	p15	p23	6	6	-2.52535	6.95672	0.04	0.873	ns
Experiment 2	Sialylated glycans	p15	p27	6	5	-3.13293	6.92123	0.017	0.403	ns
Experiment 2	Sialylated glycans	p15	p31	6	6	-3.90779	7.21771	0.005	0.154	ns
Experiment 2	Sialylated glycans	p15	p35	6	6	0.310805	7.63594	0.764	1	ns
Experiment 2	Sialylated glycans	p15	p39	6	6	-10.4528	8.20545	5.04e-06	0.000181	***
Experiment 2	Sialylated glycans	p15	p7	6	6	0.105911	6.85035	0.919	1	ns
Experiment 2	Sialylated glycans	p19	p23	6	6	-1.85561	9.90187	0.094	1	ns
Experiment 2	Sialylated glycans	p19	p27	6	5	-2.06825	8.87894	0.069	1	ns
Experiment 2	Sialylated glycans	p19	p31	6	6	-2.91036	9.99041	0.016	0.39	ns
Experiment 2	Sialylated glycans	p19	p35	6	6	0.457043	9.95438	0.657	1	ns
Experiment 2	Sialylated glycans	p19	p39	6	6	-7.55557	9.66503	2.35e-05	0.000775	***
Experiment 2	Sialylated glycans	p19	p7	6	6	0.282382	9.83537	0.784	1	ns
Experiment 2	Sialylated glycans	p23	p27	6	5	0.0919571	8.62101	0.929	1	ns
Experiment 2	Sialylated glycans	p23	p31	6	6	-0.93651	9.95292	0.371	1	ns
Experiment 2	Sialylated glycans	p23	p35	6	6	2.34321	9.73141	0.042	0.874	ns
Experiment 2	Sialylated glycans	p23	p39	6	6	-5.1016	9.2705	0.000587	0.018	*
Experiment 2	Sialylated glycans	p23	p7	6	6	2.01238	9.99088	0.072	1	ns
Experiment 2	Sialylated glycans	p27	p31	5	6	-1.1839	8.81183	0.267	1	ns
Experiment 2	Sialylated glycans	p27	p35	5	6	2.66397	8.97651	0.026	0.596	ns
Experiment 2	Sialylated glycans	p27	p39	5	6	-6.25088	8.95768	0.000153	0.005	**
Experiment 2	Sialylated glycans	p27	p7	5	6	2.21039	8.52248	0.056	1	ns
Experiment 2	Sialylated glycans	p31	p35	6	6	3.45355	9.90395	0.006	0.17	ns
Experiment 2	Sialylated glycans	p31	p39	6	6	-4.25563	9.55461	0.002	0.054	ns
Experiment 2	Sialylated glycans	p31	p7	6	6	2.99957	9.90335	0.014	0.351	ns
Experiment 2	Sialylated glycans	p35	p39	6	6	-8.35775	9.8581	8.78e-06	0.000307	***
Experiment 2	Sialylated glycans	p35	p7	6	6	-0.134084	9.63236	0.896	1	ns
Experiment 2	Sialylated glycans	p39	p7	6	6	7.2704	9.13293	4.36e-05	0.001	**
Experiment 3	Sialylated glycans	p11	p15	6	6	-1.14647	9.38242	0.28	1	ns
Experiment 3	Sialylated glycans	p11	p19	6	6	-2.43001	9.59389	0.036	0.51	ns
Experiment 3	Sialylated glycans	p11	p23	6	6	-4.05404	9.29406	0.003	0.063	ns
Experiment 3	Sialylated glycans	p11	p27	6	6	-6.40558	9.70071	8.92e-05	0.002	**
Experiment 3	Sialylated glycans	p11	p31	6	6	-5.58924	9.75499	0.000253	0.007	**
Experiment 3	Sialylated glycans	p11	p35	6	6	-0.613627	8.72006	0.555	1	ns
Experiment 3	Sialylated glycans	p11	p39	6	6	-2.88911	9.58154	0.017	0.319	ns
Experiment 3	Sialylated glycans	p15	p19	6	6	-1.10299	9.9713	0.296	1	ns
Experiment 3	Sialylated glycans	p15	p23	6	6	-2.61384	9.9958	0.026	0.44	ns
Experiment 3	Sialylated glycans	p15	p27	6	6	-4.1867	8.53941	0.003	0.063	ns
Experiment 3	Sialylated glycans	p15	p31	6	6	-3.84651	9.89656	0.003	0.072	ns
Experiment 3	Sialylated glycans	p15	p35	6	6	0.781713	7.467	0.458	1	ns
Experiment 3	Sialylated glycans	p15	p39	6	6	-1.51252	9.97479	0.161	1	ns
Experiment 3	Sialylated glycans	p19	p23	6	6	-1.59054	9.94545	0.143	1	ns
Experiment 3	Sialylated glycans	p19	p27	6	6	-3.01985	8.80678	0.015	0.296	ns
Experiment 3	Sialylated glycans	p19	p31	6	6	-2.79804	9.97619	0.019	0.34	ns
Experiment 3	Sialylated glycans	p19	p35	6	6	2.22495	7.70453	0.058	0.696	ns
Experiment 3	Sialylated glycans	p19	p39	6	6	-0.422758	9.99989	0.681	1	ns
Experiment 3	Sialylated glycans	p23	p27	6	6	-1.03154	8.437	0.331	1	ns
Experiment 3	Sialylated glycans	p23	p31	6	6	-1.06159	9.85223	0.314	1	ns
Experiment 3	Sialylated glycans	p23	p35	6	6	4.03771	7.38013	0.004	0.093	ns
Experiment 3	Sialylated glycans	p23	p39	6	6	1.18119	9.95028	0.265	1	ns
Experiment 3	Sialylated glycans	p27	p31	6	6	-0.181641	9.04423	0.86	1	ns
Experiment 3	Sialylated glycans	p27	p35	6	6	7.11146	9.52853	4.18e-05	0.001	**
Experiment 3	Sialylated glycans	p27	p39	6	6	2.51868	8.79006	0.033	0.501	ns
Experiment 3	Sialylated glycans	p31	p35	6	6	5.83583	7.93202	0.000402	0.01	*
Experiment 3	Sialylated glycans	p31	p39	6	6	2.36014	9.9728	0.04	0.52	ns
Experiment 3	Sialylated glycans	p35	p39	6	6	-2.74427	7.68915	0.026	0.44	ns

## Sheet: S7
EXP	Glycan Structure	group1	group2	n1	n2	statistic	df	p	p.adj	p.adj.signif
Experiment 1	GP4	p11	p15	6	6	-21.5601	9.56699	1.97e-09	8.47e-08	****
Experiment 1	GP4	p11	p19	6	6	-10.0975	5.92246	5.94e-05	0.001	**
Experiment 1	GP4	p11	p23	6	6	-42.322	5.38489	5.28e-08	2.06e-06	****
Experiment 1	GP4	p11	p27	6	6	-6.41678	6.47697	0.000497	0.008	**
Experiment 1	GP4	p11	p3	6	6	7.64793	6.47906	0.000179	0.003	**
Experiment 1	GP4	p11	p31	6	6	-13.1368	9.99822	1.24e-07	4.71e-06	****
Experiment 1	GP4	p11	p35	6	6	-30.8328	9.54486	7e-11	3.08e-09	****
Experiment 1	GP4	p11	p39	6	6	-13.2858	8.4907	5.64e-07	1.8e-05	****
Experiment 1	GP4	p11	p7	6	5	3.69801	5.72305	0.011	0.077	ns
Experiment 1	GP4	p15	p19	6	6	-0.0696817	6.40449	0.947	1	ns
Experiment 1	GP4	p15	p23	6	6	-6.97567	5.25006	0.000762	0.011	*
Experiment 1	GP4	p15	p27	6	6	5.82928	7.2076	0.000578	0.009	**
Experiment 1	GP4	p15	p3	6	6	19.4272	7.21055	1.72e-07	6.36e-06	****
Experiment 1	GP4	p15	p31	6	6	9.77357	9.61555	2.64e-06	7.13e-05	****
Experiment 1	GP4	p15	p35	6	6	-8.49545	9.99965	6.93e-06	0.000166	***
Experiment 1	GP4	p15	p39	6	6	4.83042	9.49986	0.0008	0.011	*
Experiment 1	GP4	p15	p7	6	5	30.0657	5.47273	2.74e-07	9.32e-06	****
Experiment 1	GP4	p19	p23	6	6	-2.59463	5.03586	0.048	0.192	ns
Experiment 1	GP4	p19	p27	6	6	4.05436	9.46526	0.003	0.028	*
Experiment 1	GP4	p19	p3	6	6	13.371	9.46227	1.85e-07	6.66e-06	****
Experiment 1	GP4	p19	p31	6	6	4.63514	5.947	0.004	0.036	*
Experiment 1	GP4	p19	p35	6	6	-4.19372	6.42046	0.005	0.039	*
Experiment 1	GP4	p19	p39	6	6	2.7252	7.17329	0.029	0.144	ns
Experiment 1	GP4	p19	p7	6	5	11.6856	5.0683	7.39e-05	0.001	**
Experiment 1	GP4	p23	p27	6	6	9.85043	5.05823	0.000172	0.003	**
Experiment 1	GP4	p23	p3	6	6	24.9095	5.05831	1.73e-06	4.84e-05	****
Experiment 1	GP4	p23	p31	6	6	23.6623	5.37477	1.21e-06	3.51e-05	****
Experiment 1	GP4	p23	p35	6	6	-4.89804	5.24714	0.004	0.036	*
Experiment 1	GP4	p23	p39	6	6	11.6609	5.15679	6.68e-05	0.001	**
Experiment 1	GP4	p23	p7	6	5	140.315	7.62027	2.79e-14	1.26e-12	****
Experiment 1	GP4	p27	p3	6	6	10.6703	9.99999	8.74e-07	2.71e-05	****
Experiment 1	GP4	p27	p31	6	6	-0.35838	6.51511	0.731	1	ns
Experiment 1	GP4	p27	p35	6	6	-11.0525	7.23104	8.67e-06	0.000199	***
Experiment 1	GP4	p27	p39	6	6	-2.321	8.26319	0.048	0.192	ns
Experiment 1	GP4	p27	p7	6	5	8.32752	5.11081	0.000367	0.006	**
Experiment 1	GP4	p3	p31	6	6	-14.4025	6.51725	3.49e-06	9.07e-05	****
Experiment 1	GP4	p3	p35	6	6	-24.6383	7.23401	3.03e-08	1.24e-06	****
Experiment 1	GP4	p3	p39	6	6	-15.2106	8.26687	2.47e-07	8.64e-06	****
Experiment 1	GP4	p3	p7	6	5	-6.67879	5.11098	0.001	0.012	*
Experiment 1	GP4	p31	p35	6	6	-19.0396	9.5944	6.07e-09	2.55e-07	****
Experiment 1	GP4	p31	p39	6	6	-3.21506	8.5575	0.011	0.077	ns
Experiment 1	GP4	p31	p7	6	5	21.481	5.70441	1.12e-06	3.36e-05	****
Experiment 1	GP4	p35	p39	6	6	12.2819	9.52279	3.74e-07	1.23e-05	****
Experiment 1	GP4	p35	p7	6	5	41.6035	5.46725	4.73e-08	1.89e-06	****
Experiment 1	GP4	p39	p7	6	5	17.9362	5.29746	6.02e-06	0.00015	***
Experiment 2	GP4	p11	p15	6	6	-3.42997	5.36975	0.017	0.133	ns
Experiment 2	GP4	p11	p19	6	6	0.201912	6.89978	0.846	0.846	ns
Experiment 2	GP4	p11	p23	6	6	-9.16088	5.86074	0.000109	0.002	**
Experiment 2	GP4	p11	p27	6	5	9.99274	4.18415	0.000448	0.006	**
Experiment 2	GP4	p11	p31	6	6	15.5804	5.79768	5.94e-06	0.000143	***
Experiment 2	GP4	p11	p35	6	6	-11.514	7.06944	7.78e-06	0.000176	***
Experiment 2	GP4	p11	p39	6	6	17.9413	6.76229	5.91e-07	1.77e-05	****
Experiment 2	GP4	p11	p7	6	6	4.56922	6.07521	0.004	0.041	*
Experiment 2	GP4	p15	p19	6	6	3.29299	6.81208	0.014	0.124	ns
Experiment 2	GP4	p15	p23	6	6	-2.29969	8.61121	0.048	0.242	ns
Experiment 2	GP4	p15	p27	6	5	10.1008	8.03063	7.66e-06	0.000176	***
Experiment 2	GP4	p15	p31	6	6	11.9873	8.803	9.46e-07	2.74e-05	****
Experiment 2	GP4	p15	p35	6	6	-1.62396	6.66044	0.151	0.604	ns
Experiment 2	GP4	p15	p39	6	6	11.2029	6.95281	1.06e-05	0.000212	***
Experiment 2	GP4	p15	p7	6	6	5.44146	8.05001	0.000602	0.007	**
Experiment 2	GP4	p19	p23	6	6	-8.08203	8.68272	2.52e-05	0.000454	***
Experiment 2	GP4	p19	p27	6	5	9.49415	4.93194	0.000236	0.004	**
Experiment 2	GP4	p19	p31	6	6	13.5346	8.49004	4.86e-07	1.51e-05	****
Experiment 2	GP4	p19	p35	6	6	-8.92862	9.97837	4.51e-06	0.000113	***
Experiment 2	GP4	p19	p39	6	6	13.9155	9.98375	7.3e-08	2.34e-06	****
Experiment 2	GP4	p19	p7	6	6	3.73139	9.22753	0.004	0.045	*
Experiment 2	GP4	p23	p27	6	5	13.3568	6.05993	1.01e-05	0.000212	***
Experiment 2	GP4	p23	p31	6	6	18.2907	9.98516	5.23e-09	1.83e-07	****
Experiment 2	GP4	p23	p35	6	6	1.28018	8.44994	0.235	0.705	ns
Experiment 2	GP4	p23	p39	6	6	18.9395	8.88228	1.73e-08	5.88e-07	****
Experiment 2	GP4	p23	p7	6	6	10.3281	9.87415	1.31e-06	3.64e-05	****
Experiment 2	GP4	p27	p31	5	6	-1.27321	6.21014	0.249	0.705	ns
Experiment 2	GP4	p27	p35	5	6	-13.5426	4.8497	4.87e-05	0.000828	***
Experiment 2	GP4	p27	p39	5	6	-2.99438	5.00938	0.03	0.181	ns
Experiment 2	GP4	p27	p7	5	6	-7.17455	5.6657	0.000478	0.006	**
Experiment 2	GP4	p31	p35	6	6	-20.4361	8.25813	2.31e-08	7.62e-07	****
Experiment 2	GP4	p31	p39	6	6	-2.69989	8.69164	0.025	0.176	ns
Experiment 2	GP4	p31	p7	6	6	-9.14858	9.77768	4.19e-06	0.000109	***
Experiment 2	GP4	p35	p39	6	6	22.9609	9.92532	6.22e-10	2.24e-08	****
Experiment 2	GP4	p35	p7	6	6	11.2685	9.01025	1.3e-06	3.64e-05	****
Experiment 2	GP4	p39	p7	6	6	-8.12307	9.40319	1.5e-05	0.000285	***
Experiment 3	GP4	p11	p15	6	6	1.77377	9.37625	0.109	0.872	ns
Experiment 3	GP4	p11	p19	6	6	2.05076	5.88035	0.087	0.784	ns
Experiment 3	GP4	p11	p23	6	6	13.4531	8.63914	4.32e-07	1.04e-05	****
Experiment 3	GP4	p11	p27	6	6	15.5963	6.12588	3.67e-06	6.61e-05	****
Experiment 3	GP4	p11	p31	6	6	11.1971	9.9142	6.03e-07	1.33e-05	****
Experiment 3	GP4	p11	p35	6	6	2.36964	9.07776	0.042	0.417	ns
Experiment 3	GP4	p11	p39	6	6	8.67061	9.92601	6.07e-06	0.000103	***
Experiment 3	GP4	p15	p19	6	6	-0.11747	6.47078	0.91	1	ns
Experiment 3	GP4	p15	p23	6	6	13.713	9.76593	1.06e-07	2.76e-06	****
Experiment 3	GP4	p15	p27	6	6	16.9541	6.86368	7.42e-07	1.56e-05	****
Experiment 3	GP4	p15	p31	6	6	10.8347	9.72248	9.64e-07	1.93e-05	****
Experiment 3	GP4	p15	p35	6	6	0.647993	9.95629	0.532	1	ns
Experiment 3	GP4	p15	p39	6	6	7.94131	8.98144	2.38e-05	0.000357	***
Experiment 3	GP4	p19	p23	6	6	19.3467	6.97179	2.57e-07	6.42e-06	****
Experiment 3	GP4	p19	p27	6	6	31.8043	9.84643	2.96e-11	8.29e-10	****
Experiment 3	GP4	p19	p31	6	6	13.5712	6.0572	9.21e-06	0.000147	***
Experiment 3	GP4	p19	p35	6	6	1.00048	6.66831	0.352	1	ns
Experiment 3	GP4	p19	p39	6	6	9.45588	5.74211	0.000103	0.001	**
Experiment 3	GP4	p23	p27	6	6	0.493094	7.46931	0.636	1	ns
Experiment 3	GP4	p23	p31	6	6	-0.846755	9.09464	0.419	1	ns
Experiment 3	GP4	p23	p35	6	6	-13.5332	9.92058	1.02e-07	2.75e-06	****
Experiment 3	GP4	p23	p39	6	6	-2.56777	8.20821	0.033	0.359	ns
Experiment 3	GP4	p27	p31	6	6	-1.35392	6.349	0.222	1	ns
Experiment 3	GP4	p27	p35	6	6	-17.0542	7.10513	5.02e-07	1.15e-05	****
Experiment 3	GP4	p27	p39	6	6	-3.18287	5.95049	0.019	0.23	ns
Experiment 3	GP4	p31	p35	6	6	-10.5384	9.48672	1.51e-06	2.87e-05	****
Experiment 3	GP4	p31	p39	6	6	-1.63138	9.69311	0.135	0.945	ns
Experiment 3	GP4	p35	p39	6	6	7.58827	8.65492	4.17e-05	0.000584	***

## Sheet: S8
EXP	Glycan Structure	group1	group2	n1	n2	statistic	df	p	p.adj	p.adj.signif
Experiment 1	GP8	p11	p15	6	6	20.9457	7.82855	3.72e-08	1.3e-06	****
Experiment 1	GP8	p11	p19	6	6	23.067	7.75193	2.01e-08	7.64e-07	****
Experiment 1	GP8	p11	p23	6	6	43.5162	9.9544	1.09e-12	4.8e-11	****
Experiment 1	GP8	p11	p27	6	6	5.39018	5.77654	0.002	0.013	*
Experiment 1	GP8	p11	p3	6	6	-9.74723	6.07045	6.24e-05	0.001	**
Experiment 1	GP8	p11	p31	6	6	13.1051	8.93623	3.88e-07	1.13e-05	****
Experiment 1	GP8	p11	p35	6	6	43.9534	9.97726	9.39e-13	4.23e-11	****
Experiment 1	GP8	p11	p39	6	6	11.4998	6.32469	1.79e-05	0.000412	***
Experiment 1	GP8	p11	p7	6	5	-4.97138	8.40922	0.000941	0.008	**
Experiment 1	GP8	p15	p19	6	6	1.93888	9.99726	0.081	0.244	ns
Experiment 1	GP8	p15	p23	6	6	8.15193	7.52247	5.42e-05	0.001	**
Experiment 1	GP8	p15	p27	6	6	-5.75351	7.36944	0.000578	0.007	**
Experiment 1	GP8	p15	p3	6	6	-21.0318	8.1132	2.29e-08	8.47e-07	****
Experiment 1	GP8	p15	p31	6	6	-8.77214	9.5304	7.21e-06	0.00018	***
Experiment 1	GP8	p15	p35	6	6	8.69133	7.61063	3.25e-05	0.000715	***
Experiment 1	GP8	p15	p39	6	6	-2.97308	8.65801	0.016	0.076	ns
Experiment 1	GP8	p15	p7	6	5	-25.5687	6.35233	1.2e-07	3.96e-06	****
Experiment 1	GP8	p19	p23	6	6	5.62515	7.45107	0.000638	0.007	**
Experiment 1	GP8	p19	p27	6	6	-6.97039	7.4392	0.000164	0.002	**
Experiment 1	GP8	p19	p3	6	6	-22.3416	8.19418	1.24e-08	4.84e-07	****
Experiment 1	GP8	p19	p31	6	6	-10.8227	9.46541	1.22e-06	3.17e-05	****
Experiment 1	GP8	p19	p35	6	6	6.16869	7.5376	0.000342	0.004	**
Experiment 1	GP8	p19	p39	6	6	-4.47269	8.74037	0.002	0.013	*
Experiment 1	GP8	p19	p7	6	5	-27.7509	6.31111	7.78e-08	2.65e-06	****
Experiment 1	GP8	p23	p27	6	6	-10.692	5.67907	5.64e-05	0.001	**
Experiment 1	GP8	p23	p3	6	6	-28.5425	5.93731	1.39e-07	4.31e-06	****
Experiment 1	GP8	p23	p31	6	6	-21.4278	8.6011	9.16e-09	3.66e-07	****
Experiment 1	GP8	p23	p35	6	6	0.87523	9.996	0.402	0.804	ns
Experiment 1	GP8	p23	p39	6	6	-9.10151	6.16167	8.48e-05	0.001	**
Experiment 1	GP8	p23	p7	6	5	-56.8808	8.6371	2.01e-12	8.64e-11	****
Experiment 1	GP8	p27	p3	6	6	-10.9087	9.74475	8.89e-07	2.4e-05	****
Experiment 1	GP8	p27	p31	6	6	0.746545	6.56413	0.481	0.804	ns
Experiment 1	GP8	p27	p35	6	6	10.9936	5.70653	4.7e-05	0.000987	***
Experiment 1	GP8	p27	p39	6	6	2.96583	9.33722	0.015	0.076	ns
Experiment 1	GP8	p27	p7	6	5	-7.14703	5.35338	0.000624	0.007	**
Experiment 1	GP8	p3	p31	6	6	16.0975	7.11918	7.35e-07	2.06e-05	****
Experiment 1	GP8	p3	p35	6	6	28.8591	5.97487	1.21e-07	3.96e-06	****
Experiment 1	GP8	p3	p39	6	6	15.8178	9.88196	2.42e-08	8.71e-07	****
Experiment 1	GP8	p3	p7	6	5	8.09104	5.4883	0.000299	0.004	**
Experiment 1	GP8	p31	p35	6	6	21.9773	8.70094	6.31e-09	2.59e-07	****
Experiment 1	GP8	p31	p39	6	6	3.39852	7.57244	0.01	0.061	ns
Experiment 1	GP8	p31	p7	6	5	-18.2449	7.02995	3.52e-07	1.06e-05	****
Experiment 1	GP8	p35	p39	6	6	-9.48698	6.20773	6.37e-05	0.001	**
Experiment 1	GP8	p35	p7	6	5	-57.1327	8.57362	2.27e-12	9.53e-11	****
Experiment 1	GP8	p39	p7	6	5	-14.0291	5.6062	1.4e-05	0.000336	***
Experiment 2	GP8	p11	p15	6	6	2.45194	5.55674	0.053	0.264	ns
Experiment 2	GP8	p11	p19	6	6	1.80956	9.99898	0.1	0.3	ns
Experiment 2	GP8	p11	p23	6	6	13.1693	7.59998	1.67e-06	3.01e-05	****
Experiment 2	GP8	p11	p27	6	5	-34.1109	8.72523	1.37e-10	4.11e-09	****
Experiment 2	GP8	p11	p31	6	6	-33.0602	9.99992	1.51e-11	4.83e-10	****
Experiment 2	GP8	p11	p35	6	6	19.6086	9.97833	2.68e-09	6.7e-08	****
Experiment 2	GP8	p11	p39	6	6	-28.6078	8.69789	6.59e-10	1.85e-08	****
Experiment 2	GP8	p11	p7	6	6	-7.97037	7.79752	5.18e-05	0.00057	***
Experiment 2	GP8	p15	p19	6	6	-1.86733	5.54566	0.115	0.3	ns
Experiment 2	GP8	p15	p23	6	6	3.77199	6.91542	0.007	0.05	*
Experiment 2	GP8	p15	p27	6	5	-13.876	5.6282	1.44e-05	0.000202	***
Experiment 2	GP8	p15	p31	6	6	-13.1917	5.55366	2.1e-05	0.000252	***
Experiment 2	GP8	p15	p35	6	6	4.06925	5.61077	0.008	0.05	*
Experiment 2	GP8	p15	p39	6	6	-10.5091	5.24672	0.000101	0.000909	***
Experiment 2	GP8	p15	p7	6	6	-5.8955	6.7666	0.000683	0.005	**
Experiment 2	GP8	p19	p23	6	6	12.004	7.55532	3.44e-06	5.85e-05	****
Experiment 2	GP8	p19	p27	6	5	-36.0205	8.69408	9.09e-11	2.82e-09	****
Experiment 2	GP8	p19	p31	6	6	-35.0395	9.99946	8.51e-12	2.84e-10	****
Experiment 2	GP8	p19	p35	6	6	17.9364	9.96797	6.47e-09	1.55e-07	****
Experiment 2	GP8	p19	p39	6	6	-30.9437	8.74814	3.04e-10	8.82e-09	****
Experiment 2	GP8	p19	p7	6	6	-9.22444	7.75085	1.9e-05	0.000247	***
Experiment 2	GP8	p23	p27	6	5	-35.9744	7.7209	7.05e-10	1.9e-08	****
Experiment 2	GP8	p23	p31	6	6	-35.0411	7.58759	1.14e-09	2.96e-08	****
Experiment 2	GP8	p23	p35	6	6	0.12071	7.81209	0.907	0.907	ns
Experiment 2	GP8	p23	p39	6	6	-31.2164	6.22095	4.5e-08	9.45e-07	****
Experiment 2	GP8	p23	p7	6	6	-17.0629	9.98114	1.03e-08	2.37e-07	****
Experiment 2	GP8	p27	p31	5	6	2.19478	8.71678	0.057	0.264	ns
Experiment 2	GP8	p27	p35	5	6	52.3444	8.84901	2.45e-12	8.58e-11	****
Experiment 2	GP8	p27	p39	5	6	12.3577	6.87721	6.01e-06	9.02e-05	****
Experiment 2	GP8	p27	p7	5	6	15.9212	7.89469	2.79e-07	5.58e-06	****
Experiment 2	GP8	p31	p35	6	6	51.9133	9.97567	1.8e-13	6.48e-12	****
Experiment 2	GP8	p31	p39	6	6	10.292	8.71179	3.62e-06	5.85e-05	****
Experiment 2	GP8	p31	p7	6	6	14.6372	7.78459	6.09e-07	1.16e-05	****
Experiment 2	GP8	p35	p39	6	6	-50.572	8.46498	8.36e-12	2.84e-10	****
Experiment 2	GP8	p35	p7	6	6	-21.472	8.01803	2.26e-08	4.97e-07	****
Experiment 2	GP8	p39	p7	6	6	9.28529	6.3281	6.45e-05	0.000645	***
Experiment 3	GP8	p11	p15	6	6	-1.71057	9.47799	0.12	0.864	ns
Experiment 3	GP8	p11	p19	6	6	-2.07085	6.12467	0.083	0.828	ns
Experiment 3	GP8	p11	p23	6	6	-11.7988	8.37282	1.66e-06	3.98e-05	****
Experiment 3	GP8	p11	p27	6	6	-13.6699	5.8232	1.21e-05	0.000194	***
Experiment 3	GP8	p11	p31	6	6	-10.302	9.44642	1.91e-06	4.3e-05	****
Experiment 3	GP8	p11	p35	6	6	-2.9577	8.92537	0.016	0.194	ns
Experiment 3	GP8	p11	p39	6	6	-8.49971	9.97226	7.03e-06	0.00012	***
Experiment 3	GP8	p15	p19	6	6	-0.00996114	6.77791	0.992	1	ns
Experiment 3	GP8	p15	p23	6	6	-11.6776	9.49779	6.03e-07	1.57e-05	****
Experiment 3	GP8	p15	p27	6	6	-14.3721	6.3137	4.64e-06	8.82e-05	****
Experiment 3	GP8	p15	p31	6	6	-9.82395	9.99938	1.87e-06	4.3e-05	****
Experiment 3	GP8	p15	p35	6	6	-1.35765	9.85272	0.205	1	ns
Experiment 3	GP8	p15	p39	6	6	-7.73749	9.67175	1.91e-05	0.000286	***
Experiment 3	GP8	p19	p23	6	6	-16.5348	7.70274	2.71e-07	7.32e-06	****
Experiment 3	GP8	p19	p27	6	6	-27.1383	9.75728	1.62e-10	4.54e-09	****
Experiment 3	GP8	p19	p31	6	6	-12.7938	6.80414	5.22e-06	9.4e-05	****
Experiment 3	GP8	p19	p35	6	6	-1.83308	7.22702	0.108	0.864	ns
Experiment 3	GP8	p19	p39	6	6	-9.46503	6.24615	6.23e-05	0.000872	***
Experiment 3	GP8	p23	p27	6	6	-0.472433	7.04262	0.651	1	ns
Experiment 3	GP8	p23	p31	6	6	0.829003	9.52826	0.427	1	ns
Experiment 3	GP8	p23	p35	6	6	11.0213	9.87872	7.2e-07	1.8e-05	****
Experiment 3	GP8	p23	p39	6	6	1.92578	8.63647	0.088	0.828	ns
Experiment 3	GP8	p27	p31	6	6	1.38436	6.33372	0.213	1	ns
Experiment 3	GP8	p27	p35	6	6	14.0967	6.66115	3.31e-06	6.95e-05	****
Experiment 3	GP8	p27	p39	6	6	2.53169	5.9134	0.045	0.496	ns
Experiment 3	GP8	p31	p35	6	6	9.04857	9.87053	4.32e-06	8.64e-05	****
Experiment 3	GP8	p31	p39	6	6	1.10446	9.64522	0.296	1	ns
Experiment 3	GP8	p35	p39	6	6	-6.89342	9.17564	6.48e-05	0.000872	***

## Sheet: S9
EXP	Glycan Structure	group1	group2	n1	n2	statistic	df	p	p.adj	p.adj.signif
Experiment 1	GP9	p11	p15	6	6	21.1332	7.97482	2.75e-08	1.02e-06	****
Experiment 1	GP9	p11	p19	6	6	14.9309	5.97874	5.85e-06	0.00016	***
Experiment 1	GP9	p11	p23	6	6	40.315	9.80248	3.2e-12	1.44e-10	****
Experiment 1	GP9	p11	p27	6	6	4.34632	5.65253	0.006	0.05	ns
Experiment 1	GP9	p11	p3	6	6	-5.70025	5.52547	0.002	0.02	*
Experiment 1	GP9	p11	p31	6	6	16.797	9.76021	1.59e-08	6.04e-07	****
Experiment 1	GP9	p11	p35	6	6	39.3515	9.67229	5.31e-12	2.34e-10	****
Experiment 1	GP9	p11	p39	6	6	21.8022	7.13373	8.6e-08	3.1e-06	****
Experiment 1	GP9	p11	p7	6	5	-5.5625	8.34625	0.000459	0.007	**
Experiment 1	GP9	p15	p19	6	6	2.02751	7.74942	0.078	0.313	ns
Experiment 1	GP9	p15	p23	6	6	9.15226	8.68058	9.52e-06	0.000228	***
Experiment 1	GP9	p15	p27	6	6	-5.82397	6.91133	0.000678	0.009	**
Experiment 1	GP9	p15	p3	6	6	-14.4757	6.55774	3.2e-06	9.28e-05	****
Experiment 1	GP9	p15	p31	6	6	-7.8941	8.75579	2.89e-05	0.000636	***
Experiment 1	GP9	p15	p35	6	6	9.05695	8.8944	8.78e-06	0.00022	***
Experiment 1	GP9	p15	p39	6	6	3.11326	9.6483	0.012	0.08	ns
Experiment 1	GP9	p15	p7	6	5	-26.3574	6.38734	9.27e-08	3.24e-06	****
Experiment 1	GP9	p19	p23	6	6	3.47663	6.29294	0.012	0.08	ns
Experiment 1	GP9	p19	p27	6	6	-6.40387	9.60579	9.34e-05	0.002	**
Experiment 1	GP9	p19	p3	6	6	-13.9531	9.15152	1.78e-07	6.05e-06	****
Experiment 1	GP9	p19	p31	6	6	-7.05597	6.33125	0.000319	0.005	**
Experiment 1	GP9	p19	p35	6	6	3.47615	6.40531	0.012	0.08	ns
Experiment 1	GP9	p19	p39	6	6	0.306502	8.69218	0.766	1	ns
Experiment 1	GP9	p19	p7	6	5	-17.3761	5.43111	5.72e-06	0.00016	***
Experiment 1	GP9	p23	p27	6	6	-10.8085	5.86558	4.31e-05	0.000819	***
Experiment 1	GP9	p23	p3	6	6	-19.3115	5.69784	2.07e-06	6.21e-05	****
Experiment 1	GP9	p23	p31	6	6	-21.7045	9.99771	9.67e-10	3.96e-08	****
Experiment 1	GP9	p23	p35	6	6	0.0359838	9.98133	0.972	1	ns
Experiment 1	GP9	p23	p39	6	6	-4.40117	7.73873	0.002	0.026	*
Experiment 1	GP9	p23	p7	6	5	-51.273	7.78678	3.92e-11	1.69e-09	****
Experiment 1	GP9	p27	p3	6	6	-7.34949	9.88342	2.62e-05	0.000603	***
Experiment 1	GP9	p27	p31	6	6	2.04571	5.89175	0.088	0.313	ns
Experiment 1	GP9	p27	p35	6	6	10.7842	5.94249	4.01e-05	0.000802	***
Experiment 1	GP9	p27	p39	6	6	7.52785	7.69405	8.27e-05	0.001	**
Experiment 1	GP9	p27	p7	6	5	-6.10766	5.28677	0.001	0.018	*
Experiment 1	GP9	p3	p31	6	6	11.3824	5.71906	3.82e-05	0.000802	***
Experiment 1	GP9	p3	p35	6	6	19.2679	5.76023	1.89e-06	5.86e-05	****
Experiment 1	GP9	p3	p39	6	6	15.7873	7.22824	7.25e-07	2.32e-05	****
Experiment 1	GP9	p3	p7	6	5	4.26731	5.23083	0.007	0.058	ns
Experiment 1	GP9	p31	p35	6	6	21.2726	9.99209	1.19e-09	4.76e-08	****
Experiment 1	GP9	p31	p39	6	6	10.3866	7.80856	7.64e-06	0.000199	***
Experiment 1	GP9	p31	p7	6	5	-24.1793	7.72641	1.46e-08	5.69e-07	****
Experiment 1	GP9	p35	p39	6	6	-4.38085	7.94093	0.002	0.026	*
Experiment 1	GP9	p35	p7	6	5	-49.6585	7.61474	7.67e-11	3.22e-09	****
Experiment 1	GP9	p39	p7	6	5	-26.029	5.96135	2.29e-07	7.56e-06	****
Experiment 2	GP9	p11	p15	6	6	1.95664	5.32801	0.104	0.416	ns
Experiment 2	GP9	p11	p19	6	6	5.20147	9.31639	0.000504	0.006	**
Experiment 2	GP9	p11	p23	6	6	16.8269	7.3829	3.71e-07	9.65e-06	****
Experiment 2	GP9	p11	p27	6	5	-15.2924	4.71267	3.38e-05	0.000575	***
Experiment 2	GP9	p11	p31	6	6	-14.4247	5.70512	1.05e-05	0.0002	***
Experiment 2	GP9	p11	p35	6	6	18.3397	7.1744	2.73e-07	7.37e-06	****
Experiment 2	GP9	p11	p39	6	6	-25.2342	9.97554	2.28e-10	7.98e-09	****
Experiment 2	GP9	p11	p7	6	6	-6.48594	5.75051	0.000756	0.008	**
Experiment 2	GP9	p15	p19	6	6	-0.798612	5.18832	0.459	0.918	ns
Experiment 2	GP9	p15	p23	6	6	4.50772	6.27338	0.004	0.025	*
Experiment 2	GP9	p15	p27	6	5	-9.98825	8.01078	8.48e-06	0.000174	***
Experiment 2	GP9	p15	p31	6	6	-10.0434	8.81458	4.04e-06	8.89e-05	****
Experiment 2	GP9	p15	p35	6	6	5.34234	6.40605	0.001	0.013	*
Experiment 2	GP9	p15	p39	6	6	-8.18009	5.29712	0.000336	0.004	**
Experiment 2	GP9	p15	p7	6	6	-5.3634	8.65809	0.000518	0.006	**
Experiment 2	GP9	p19	p23	6	6	14.5328	6.42487	3.73e-06	8.58e-05	****
Experiment 2	GP9	p19	p27	6	5	-17.4629	4.40906	3.07e-05	0.000553	***
Experiment 2	GP9	p19	p31	6	6	-16.3354	5.4059	8.28e-06	0.000174	***
Experiment 2	GP9	p19	p35	6	6	16.1794	6.29055	2.31e-06	5.54e-05	****
Experiment 2	GP9	p19	p39	6	6	-34.0049	9.52069	2.91e-11	1.05e-09	****
Experiment 2	GP9	p19	p7	6	6	-8.34027	5.43222	0.000269	0.004	**
Experiment 2	GP9	p23	p27	6	5	-23.3287	6.64166	1.27e-07	3.68e-06	****
Experiment 2	GP9	p23	p31	6	6	-22.0014	7.59186	3.75e-08	1.16e-06	****
Experiment 2	GP9	p23	p35	6	6	1.765	9.97366	0.108	0.416	ns
Experiment 2	GP9	p23	p39	6	6	-32.8098	7.18176	4.33e-09	1.47e-07	****
Experiment 2	GP9	p23	p7	6	6	-14.9275	7.73394	5.6e-07	1.4e-05	****
Experiment 2	GP9	p27	p31	5	6	-0.504517	8.99998	0.626	0.918	ns
Experiment 2	GP9	p27	p35	5	6	24.295	6.87979	6.33e-08	1.9e-06	****
Experiment 2	GP9	p27	p39	5	6	5.36199	4.64562	0.004	0.025	*
Experiment 2	GP9	p27	p7	5	6	5.86854	8.99197	0.000239	0.004	**
Experiment 2	GP9	p31	p35	6	6	22.9294	7.82593	1.86e-08	5.95e-07	****
Experiment 2	GP9	p31	p39	6	6	5.48073	5.63916	0.002	0.015	*
Experiment 2	GP9	p31	p7	6	6	6.03946	9.99008	0.000126	0.002	**
Experiment 2	GP9	p35	p39	6	6	-33.6689	6.987	5.43e-09	1.79e-07	****
Experiment 2	GP9	p35	p7	6	6	-15.9578	7.97486	2.46e-07	6.89e-06	****
Experiment 2	GP9	p39	p7	6	6	2.7515	5.68039	0.035	0.176	ns
Experiment 3	GP9	p11	p15	6	6	-1.3562	9.84364	0.205	1	ns
Experiment 3	GP9	p11	p19	6	6	-2.14914	5.50159	0.079	0.714	ns
Experiment 3	GP9	p11	p23	6	6	-11.5187	7.18071	6.88e-06	0.000144	***
Experiment 3	GP9	p11	p27	6	6	-12.6801	6.03833	1.41e-05	0.000212	***
Experiment 3	GP9	p11	p31	6	6	-11.2281	6.9448	1.05e-05	0.000189	***
Experiment 3	GP9	p11	p35	6	6	-2.64245	8.76789	0.027	0.301	ns
Experiment 3	GP9	p11	p39	6	6	-8.91644	9.0395	8.95e-06	0.000179	***
Experiment 3	GP9	p15	p19	6	6	-0.43459	5.64518	0.68	1	ns
Experiment 3	GP9	p15	p23	6	6	-10.9339	7.7198	5.71e-06	0.000126	***
Experiment 3	GP9	p15	p27	6	6	-12.2743	6.32824	1.2e-05	0.000204	***
Experiment 3	GP9	p15	p31	6	6	-10.6191	7.44224	9.26e-06	0.000179	***
Experiment 3	GP9	p15	p35	6	6	-1.24355	9.36143	0.244	1	ns
Experiment 3	GP9	p15	p39	6	6	-8.06742	9.58337	1.42e-05	0.000212	***
Experiment 3	GP9	p19	p23	6	6	-19.9809	7.0902	1.7e-07	4.42e-06	****
Experiment 3	GP9	p19	p27	6	6	-28.2376	8.89617	5.14e-10	1.44e-08	****
Experiment 3	GP9	p19	p31	6	6	-20.1097	7.33951	1.09e-07	2.94e-06	****
Experiment 3	GP9	p19	p35	6	6	-1.3855	6.09258	0.214	1	ns
Experiment 3	GP9	p19	p39	6	6	-11.7046	5.97965	2.4e-05	0.000312	***
Experiment 3	GP9	p23	p27	6	6	-0.962202	8.78202	0.362	1	ns
Experiment 3	GP9	p23	p31	6	6	0.700288	9.96077	0.5	1	ns
Experiment 3	GP9	p23	p35	6	6	11.588	9.02328	1.01e-06	2.52e-05	****
Experiment 3	GP9	p23	p39	6	6	2.12096	8.75103	0.064	0.638	ns
Experiment 3	GP9	p27	p31	6	6	1.83388	9.08653	0.1	0.797	ns
Experiment 3	GP9	p27	p35	6	6	13.5569	7.19194	2.21e-06	5.08e-05	****
Experiment 3	GP9	p27	p39	6	6	3.03708	6.98066	0.019	0.228	ns
Experiment 3	GP9	p31	p35	6	6	11.2568	8.71588	1.73e-06	4.15e-05	****
Experiment 3	GP9	p31	p39	6	6	1.61508	8.43744	0.143	1	ns
Experiment 3	GP9	p35	p39	6	6	-7.91124	9.96907	1.32e-05	0.000211	***

[truncated: 1 more sheets: S10]
